# Supplementary material
Source: PubMed Central journal article supplement (PMC11305925)

# Study design and sample collection strategy

## Prospective, observational cohort

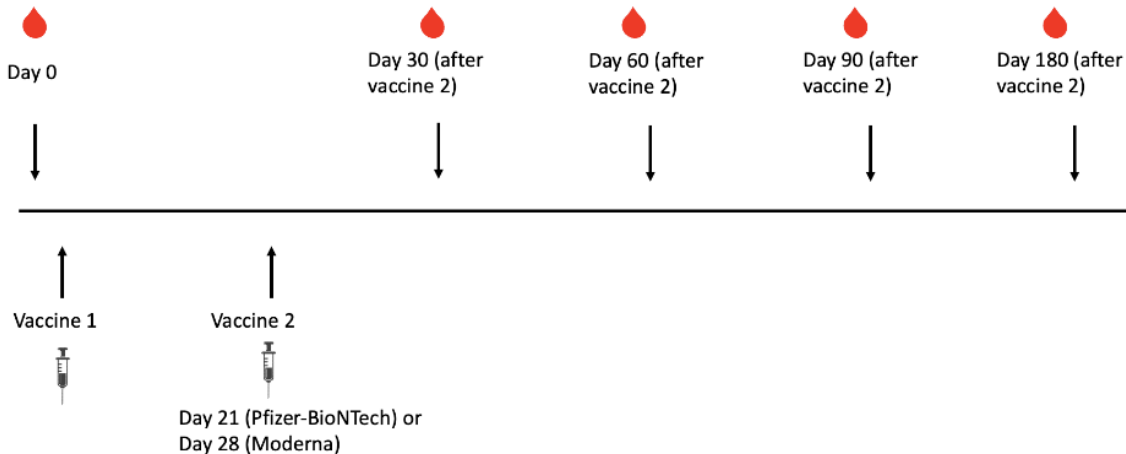

Supplement: NIHMS1990255-supplement-MMC1.pdf [file NIHMS1990255-supplement-MMC1.pdf]

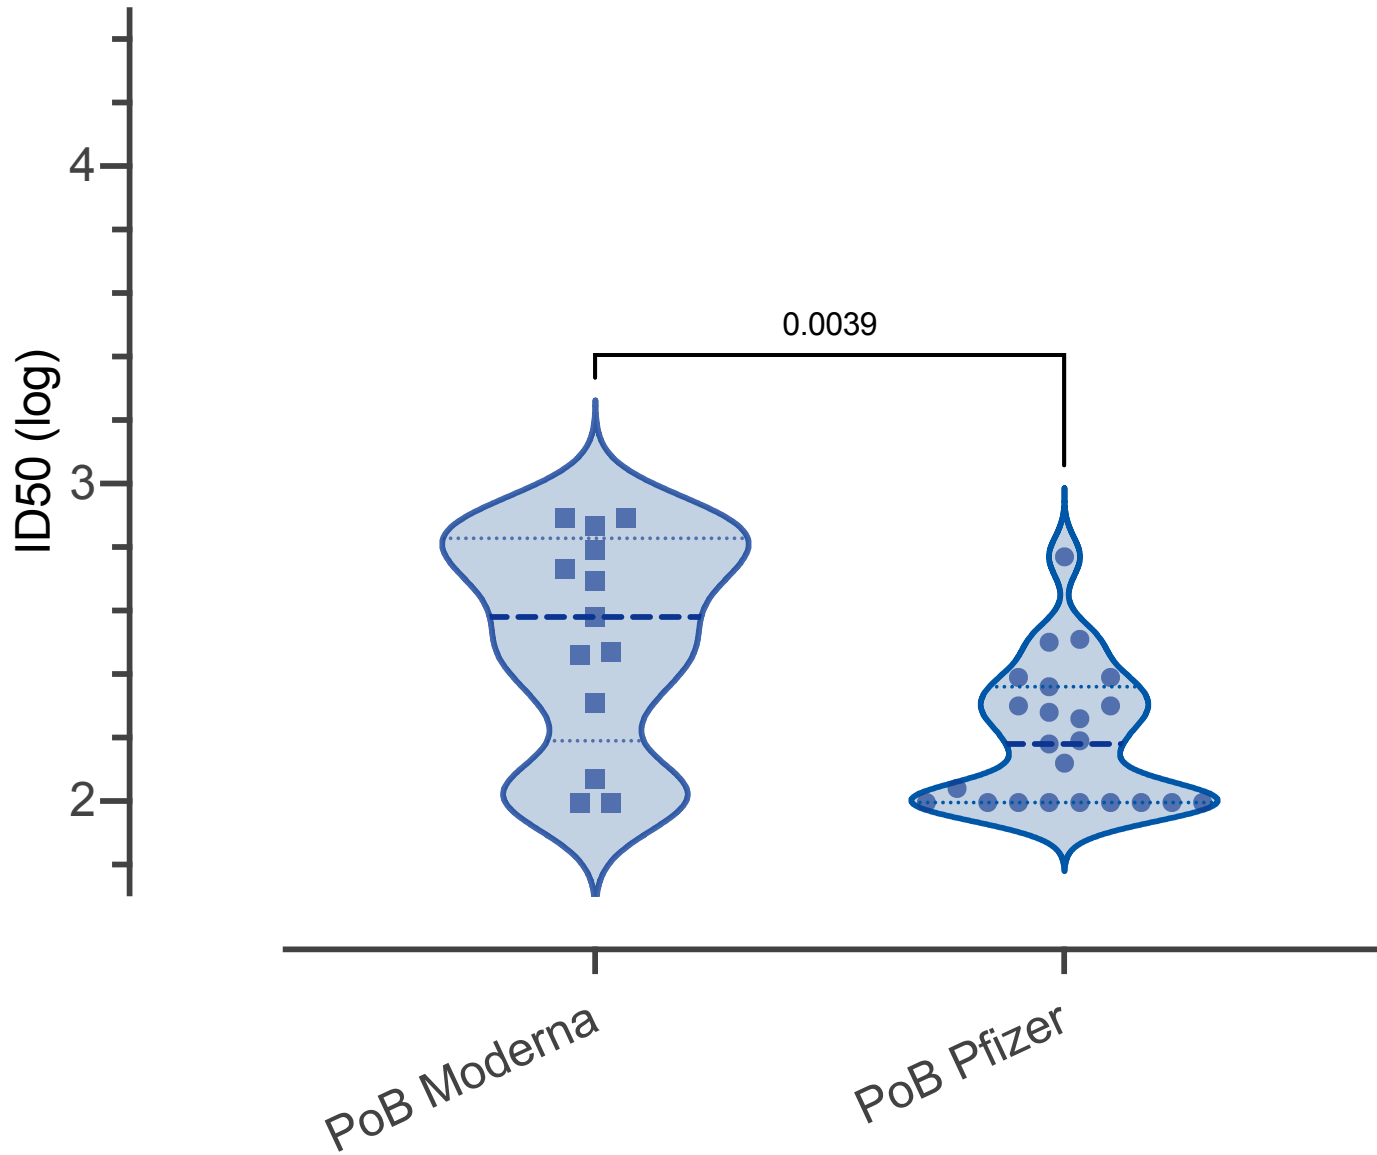

Supplement: NIHMS1990255-supplement-MMC10.pdf [file NIHMS1990255-supplement-MMC10.pdf]

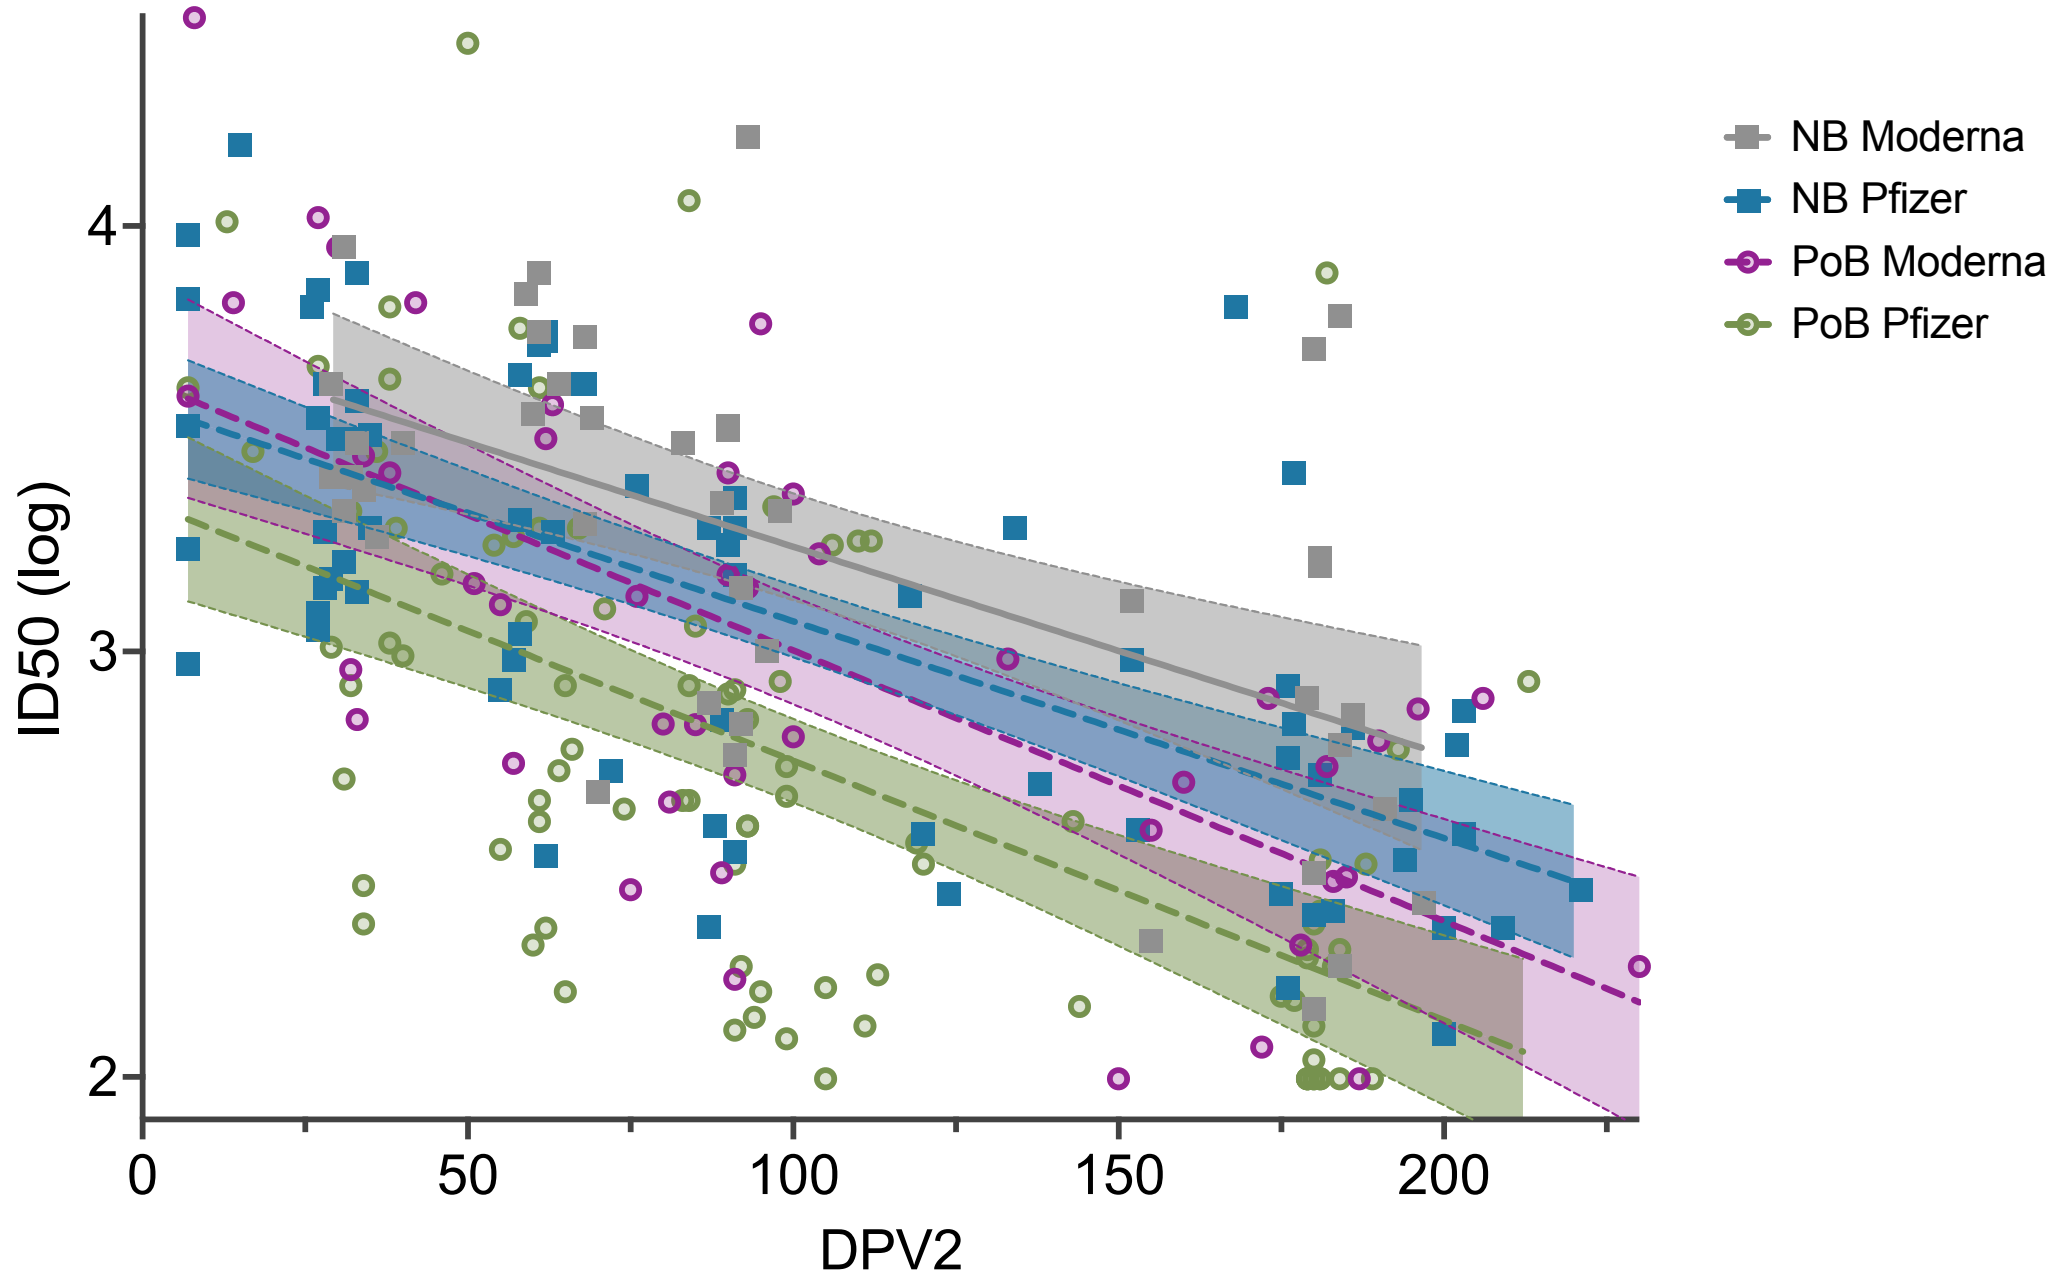

Supplement: NIHMS1990255-supplement-MMC11.pdf [file NIHMS1990255-supplement-MMC11.pdf]

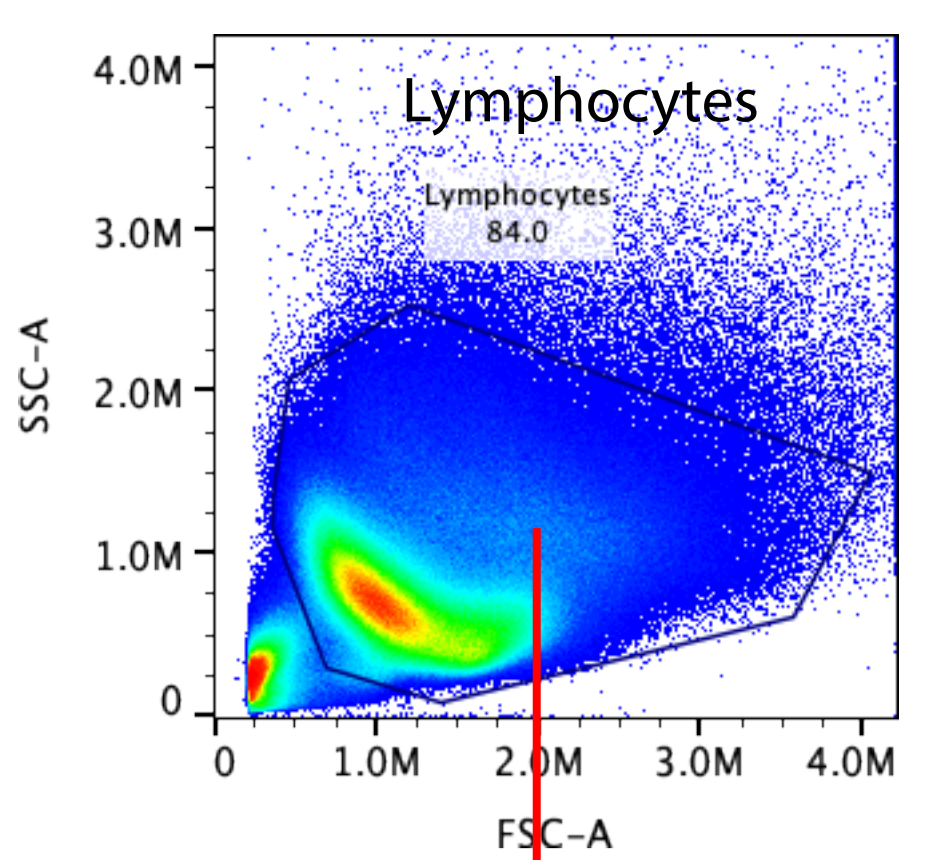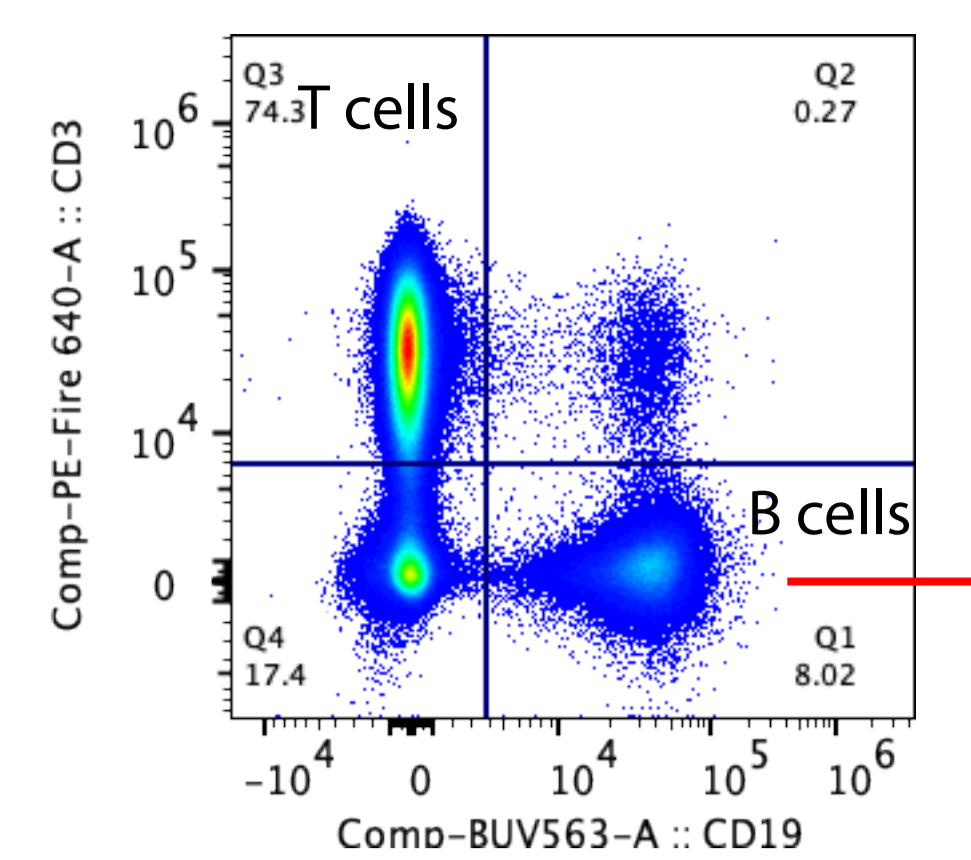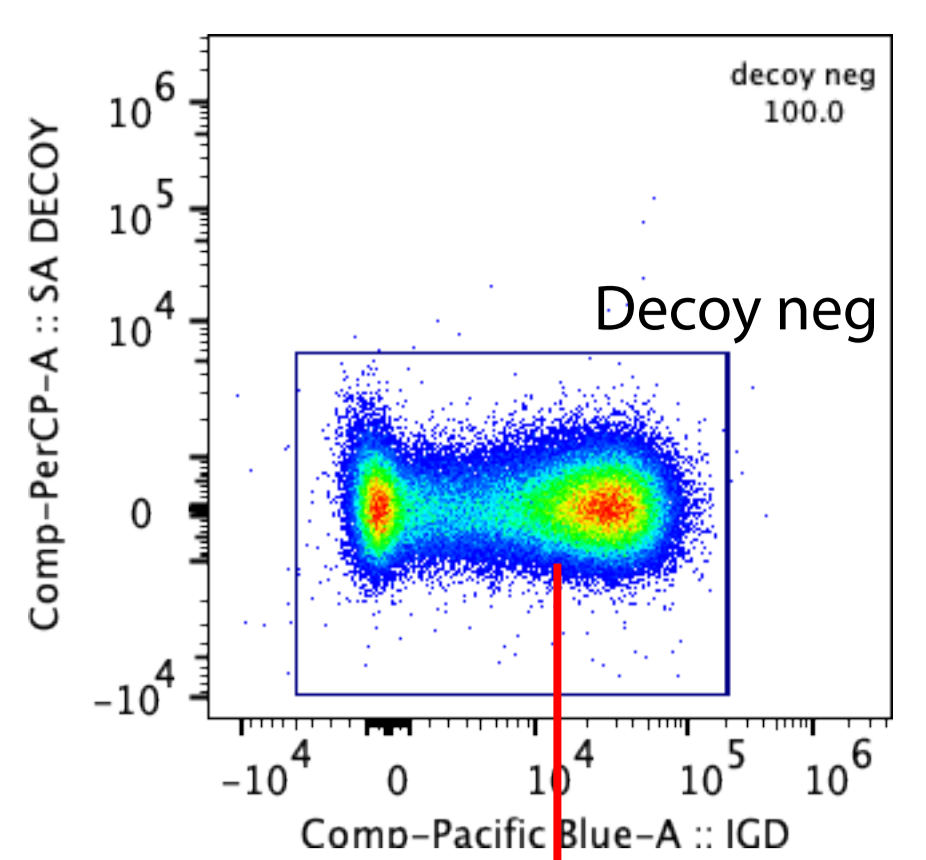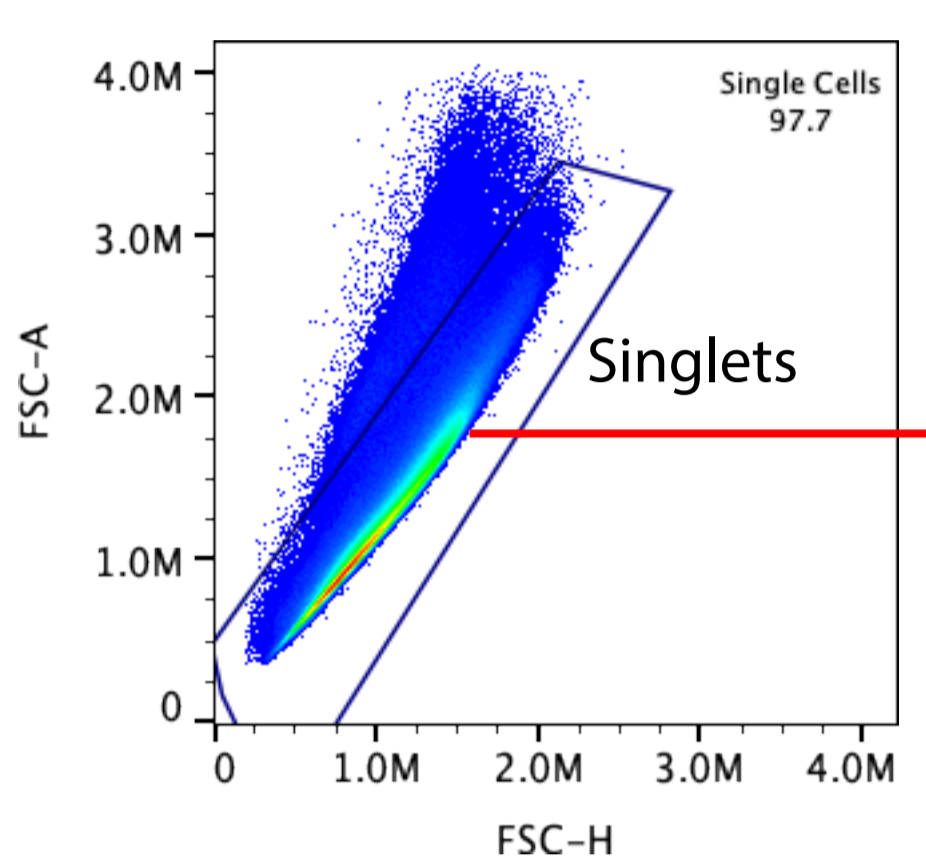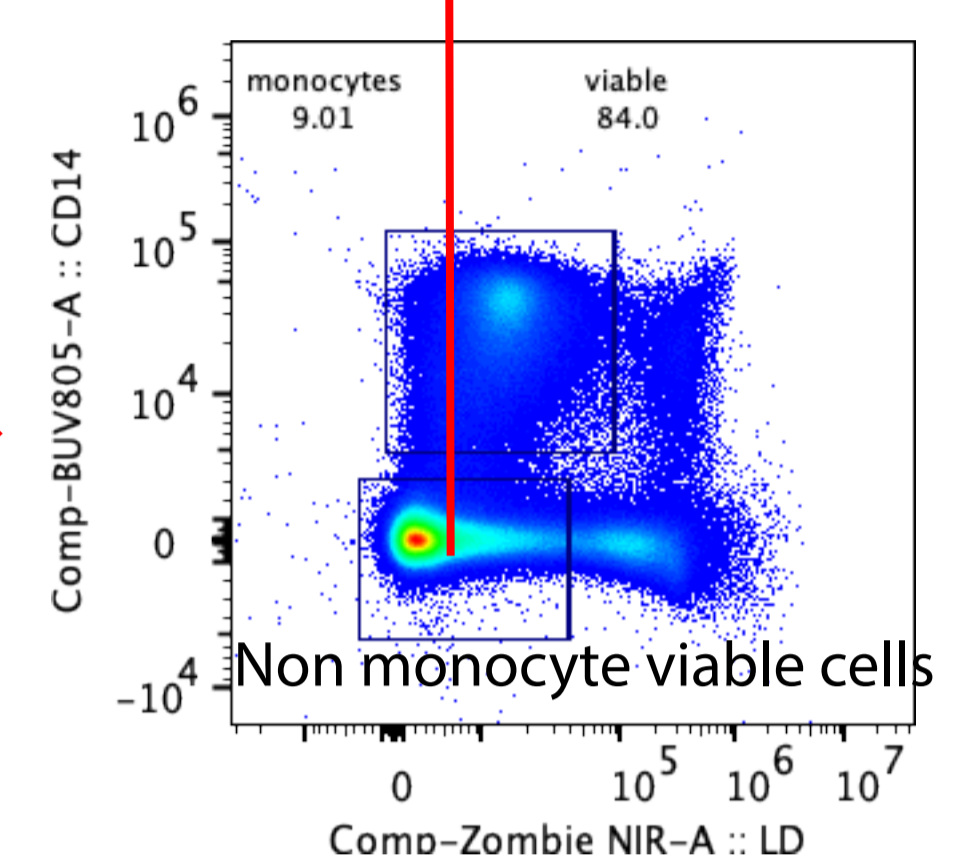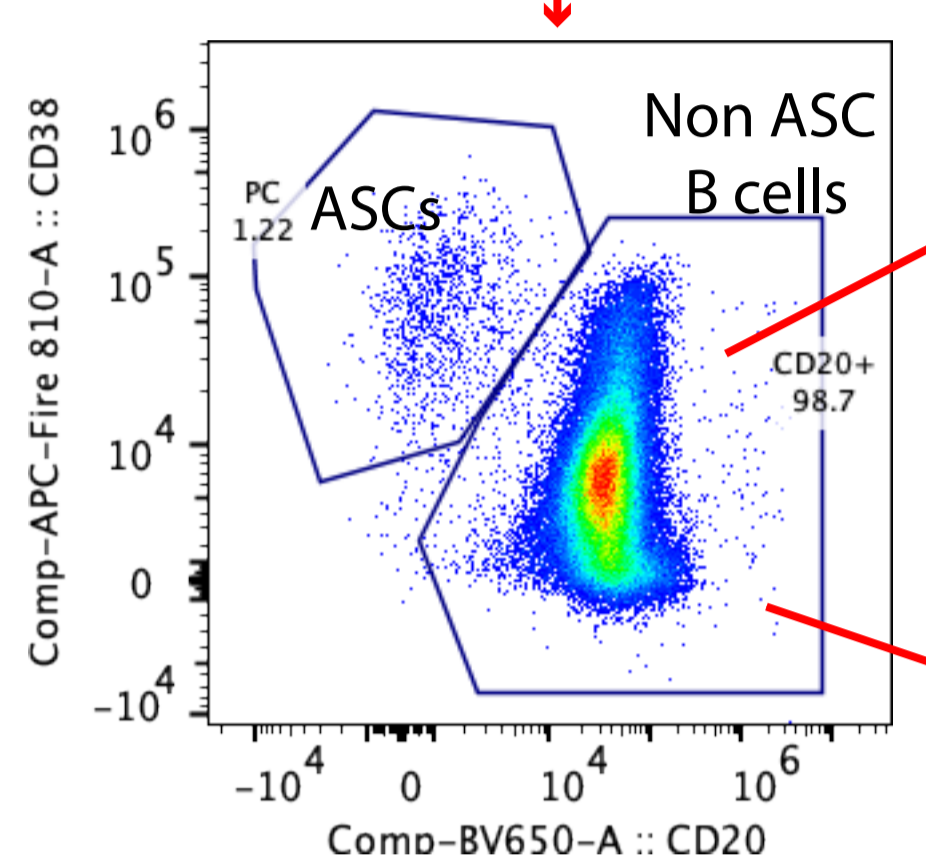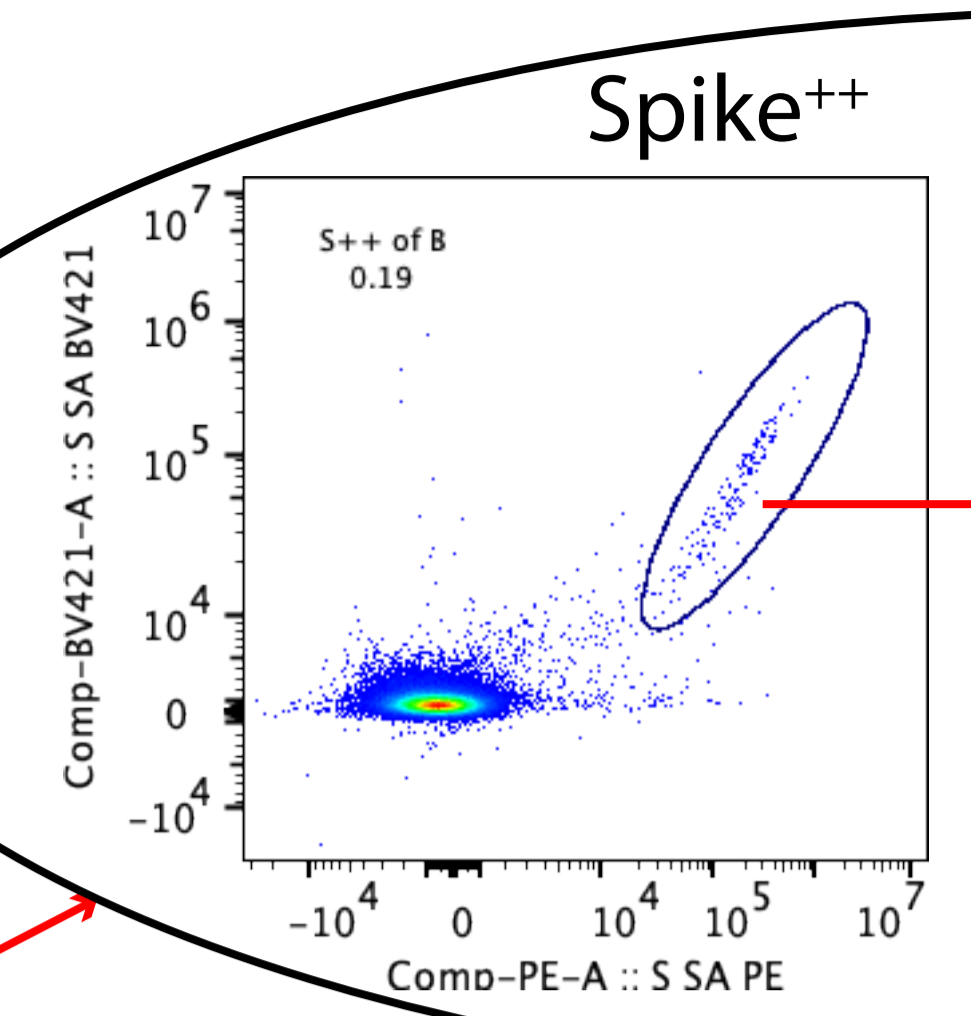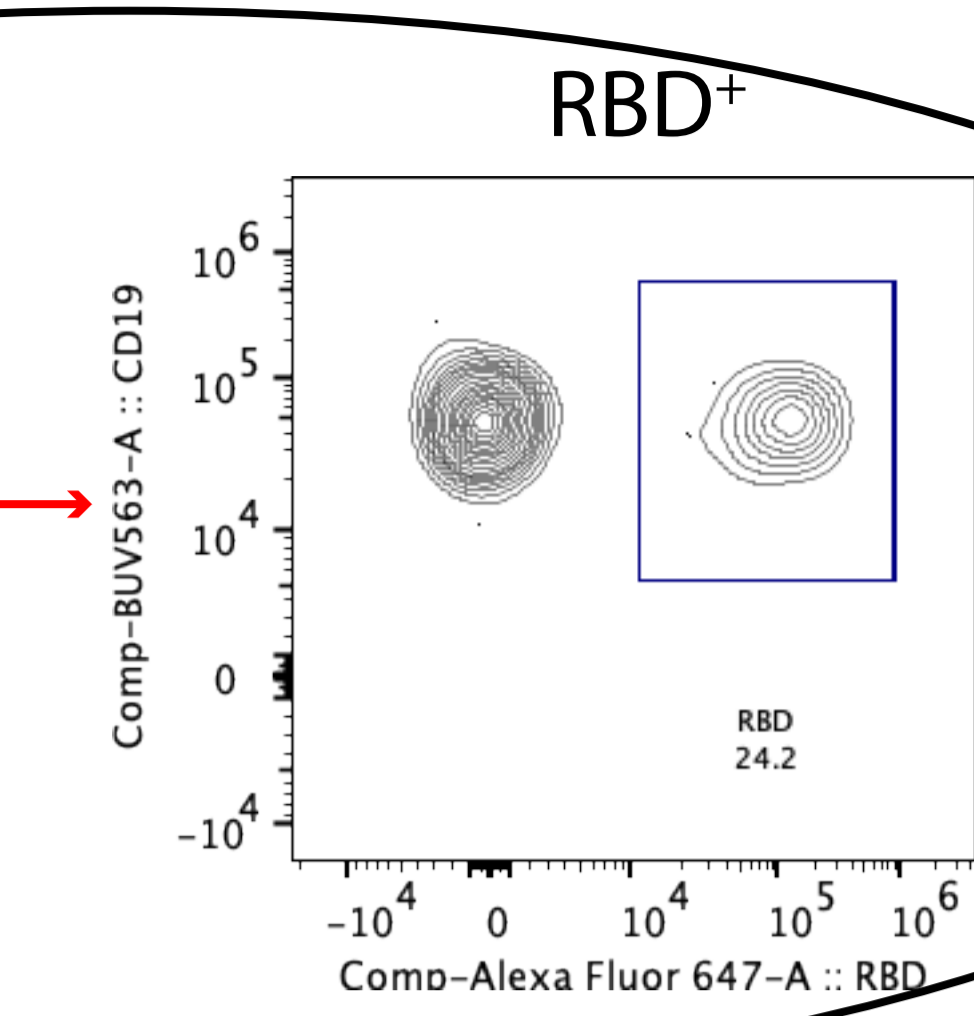

Total B cells

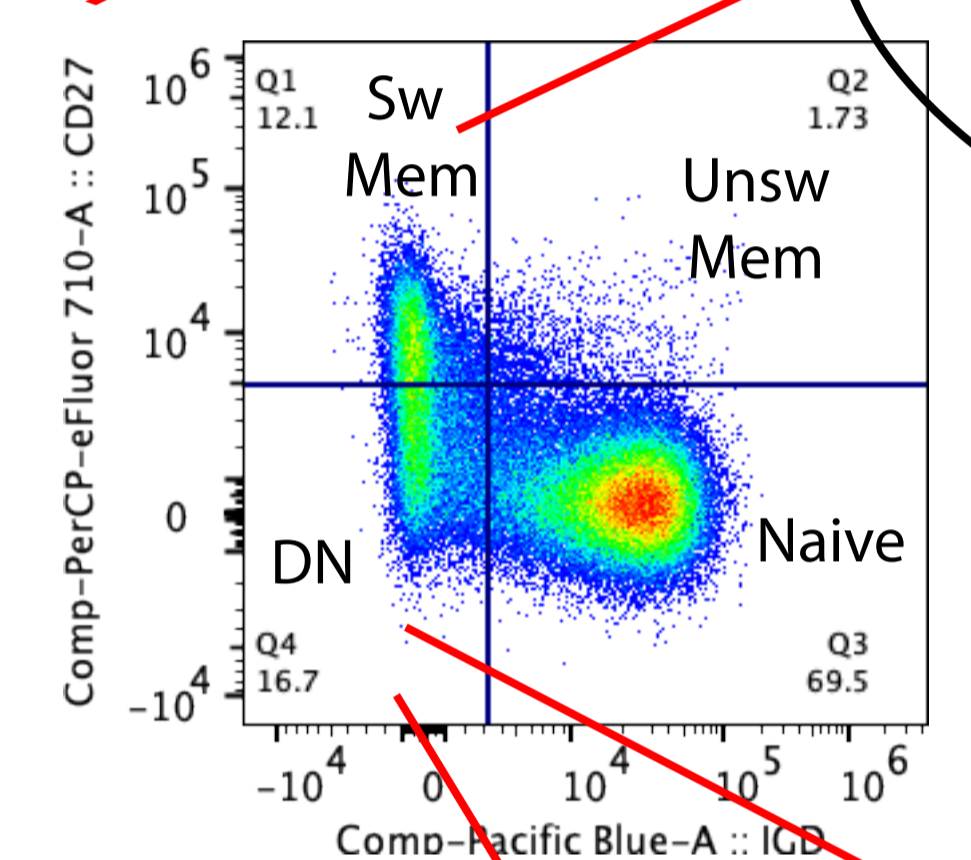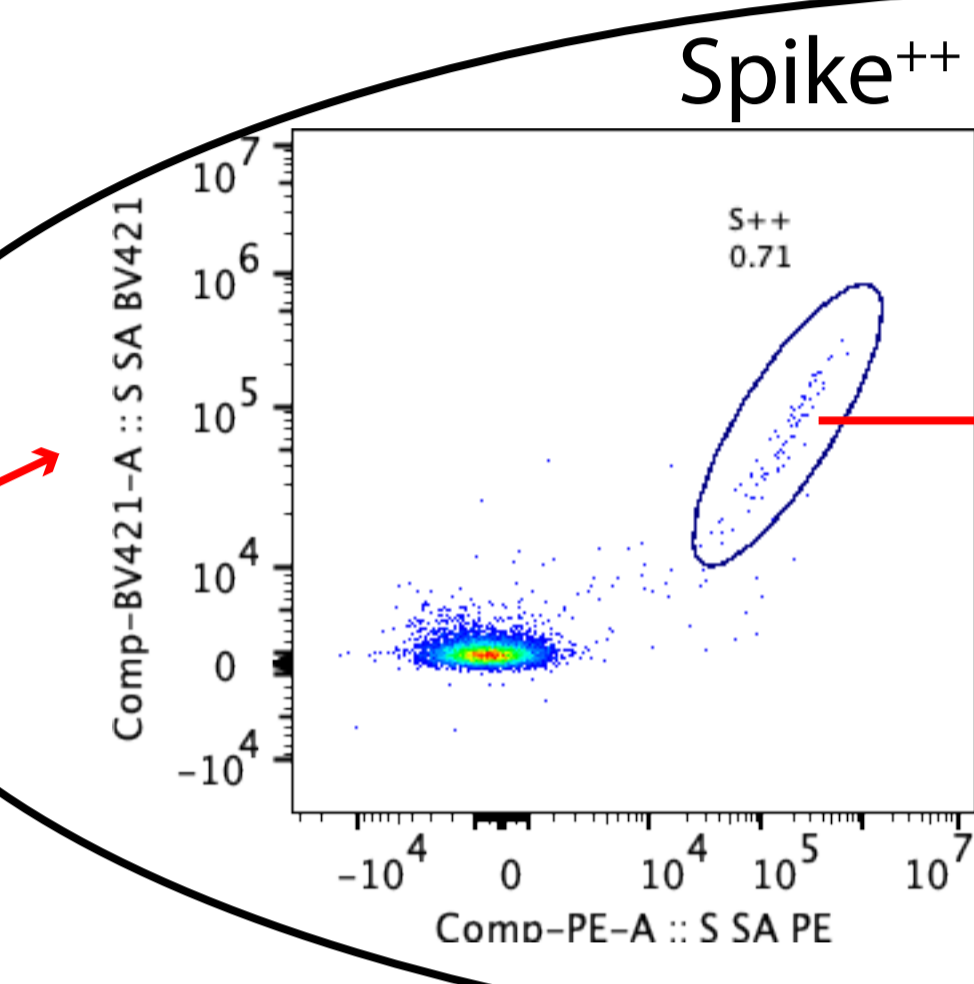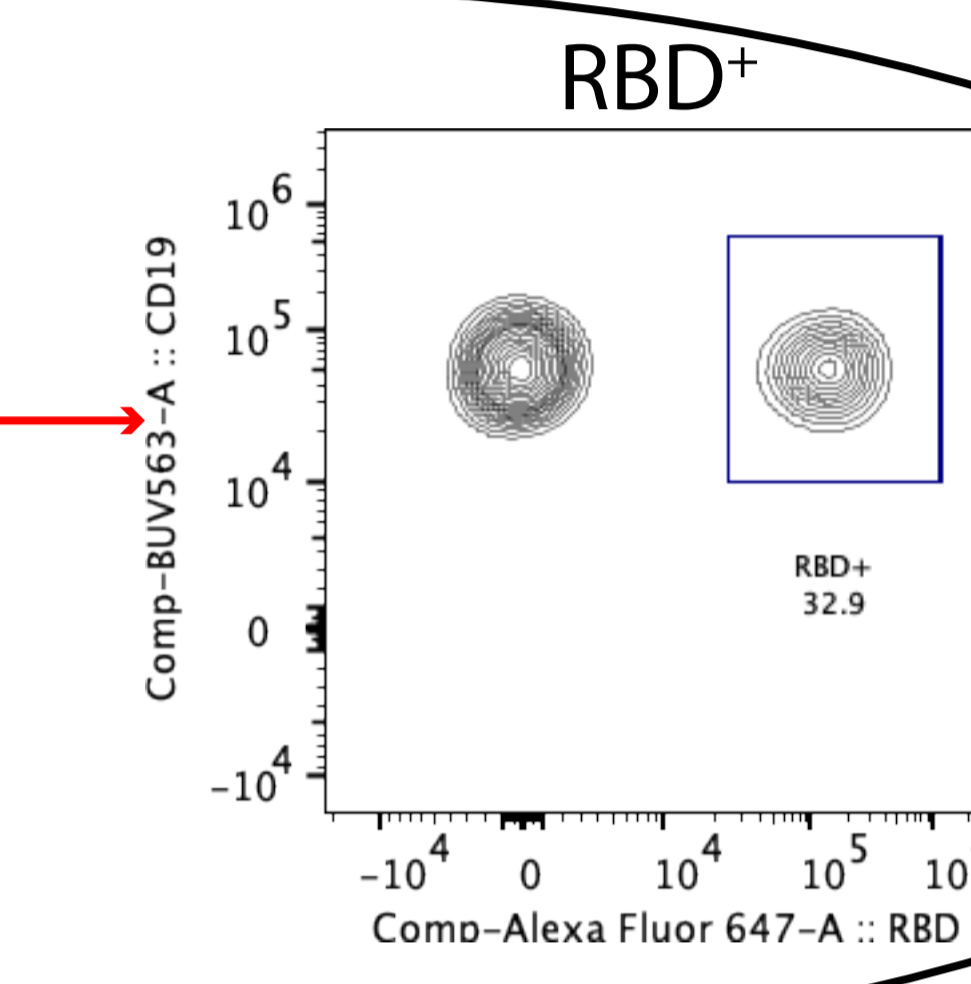

Switched Memory B cells

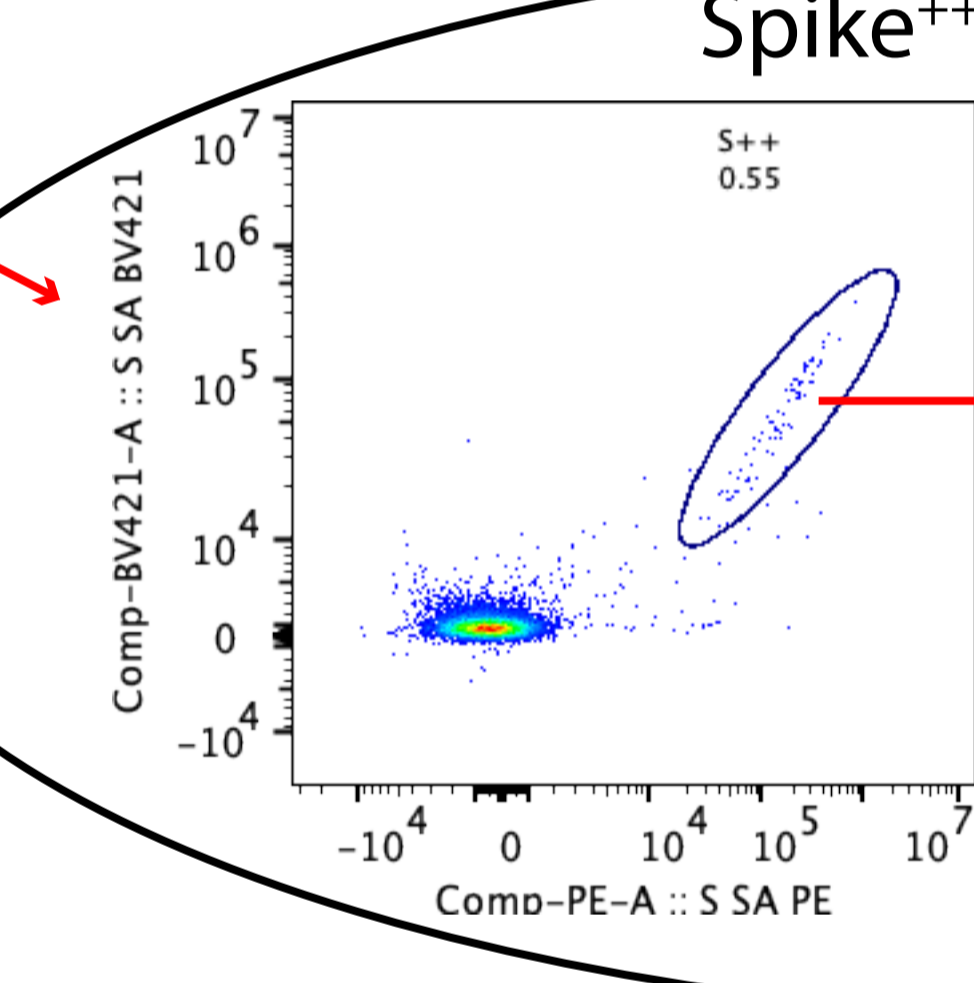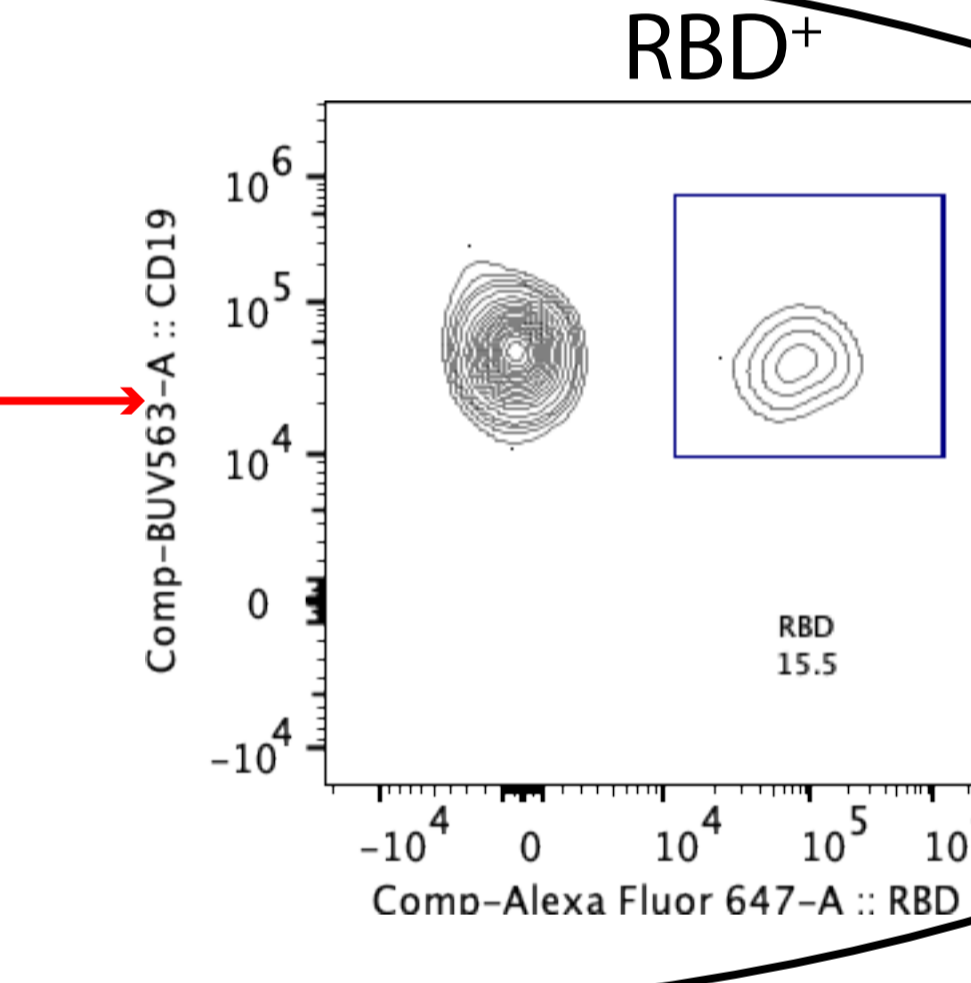

Total double negative (DN) B cells

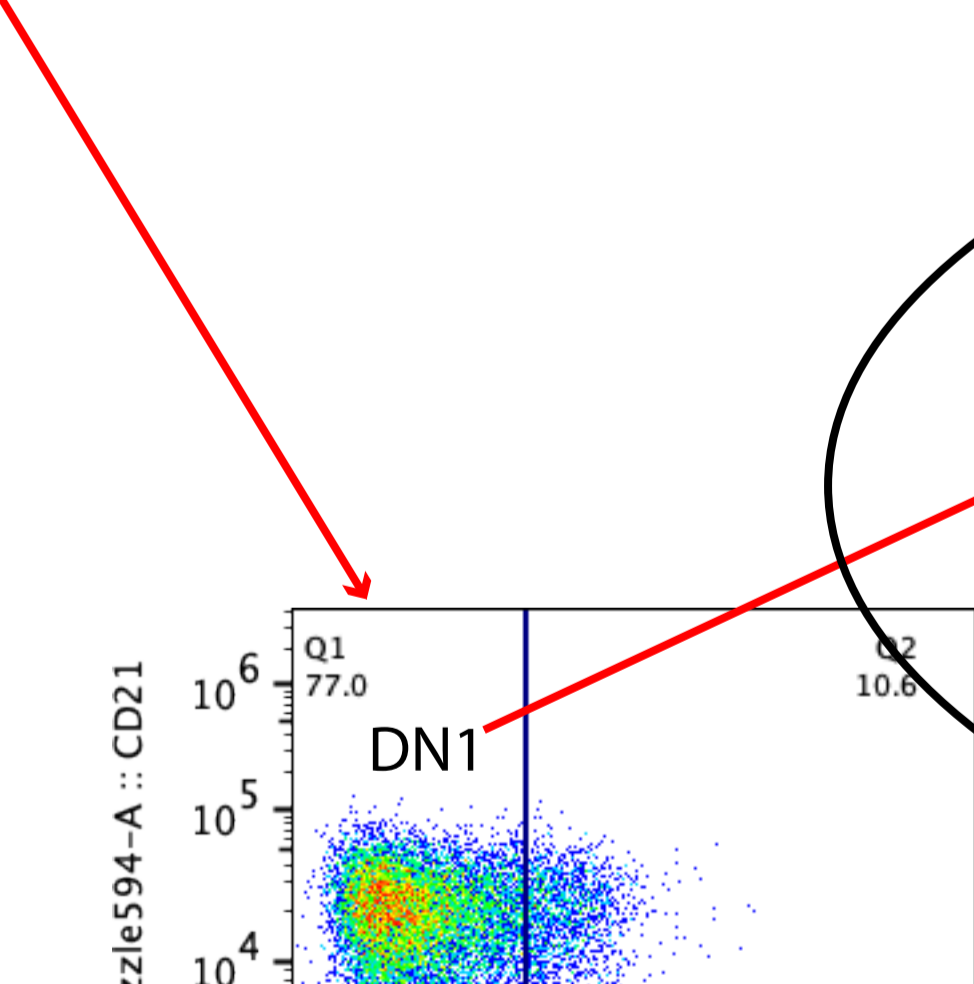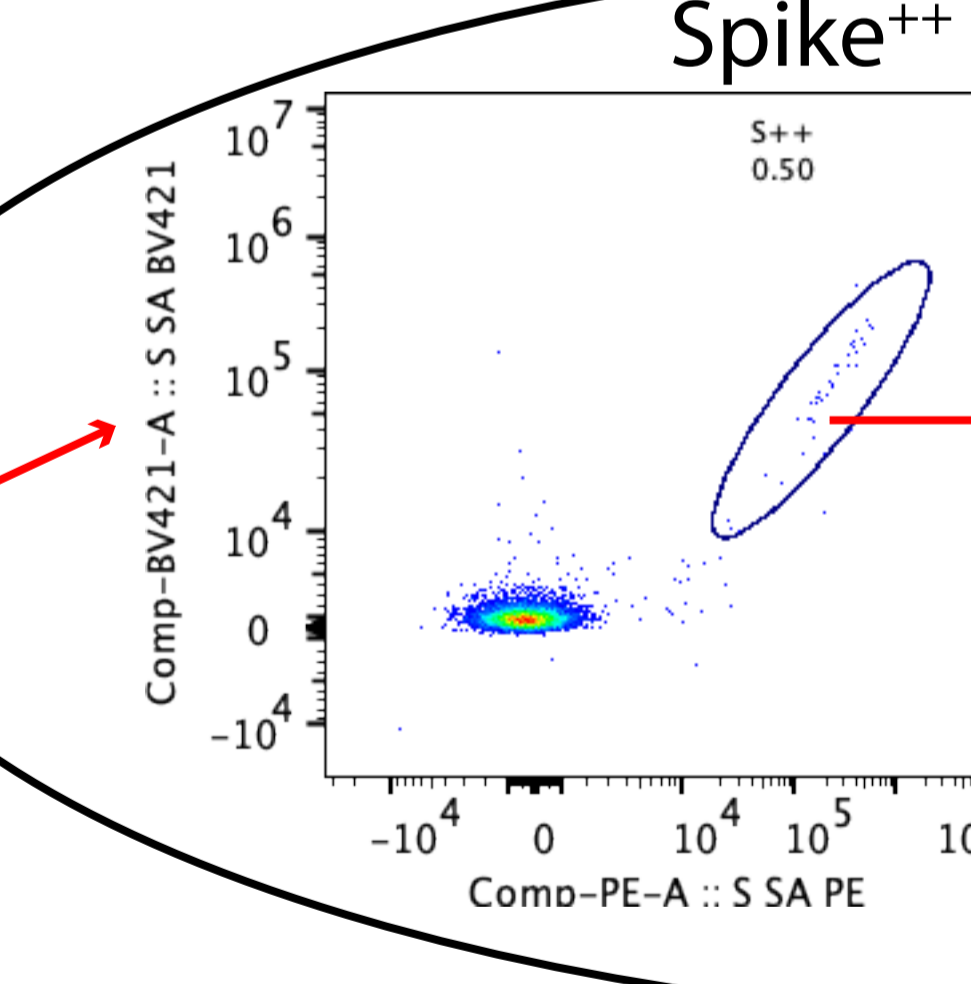

DN1 B cells

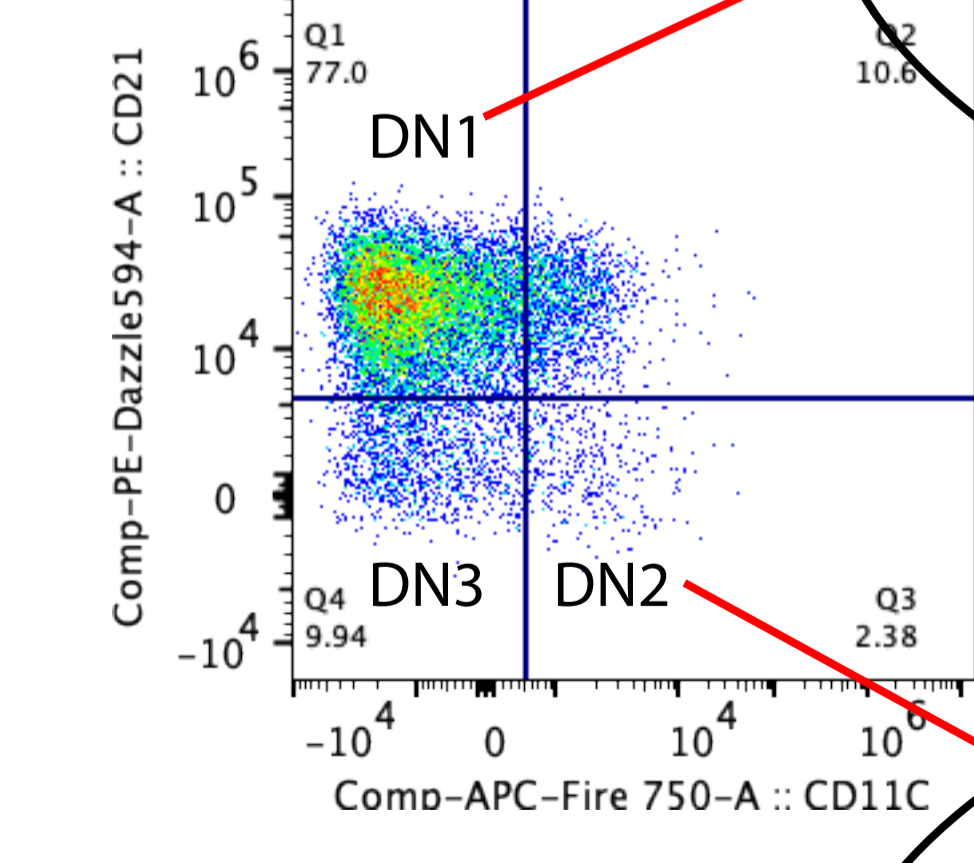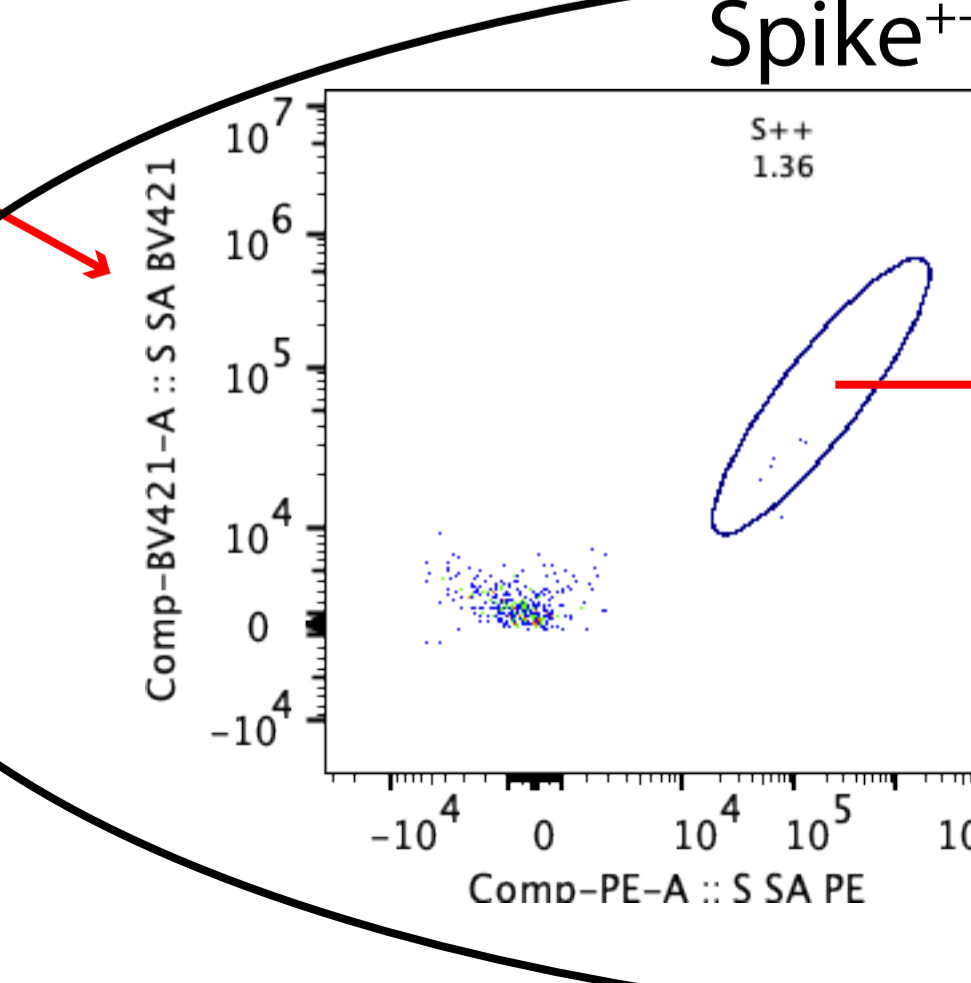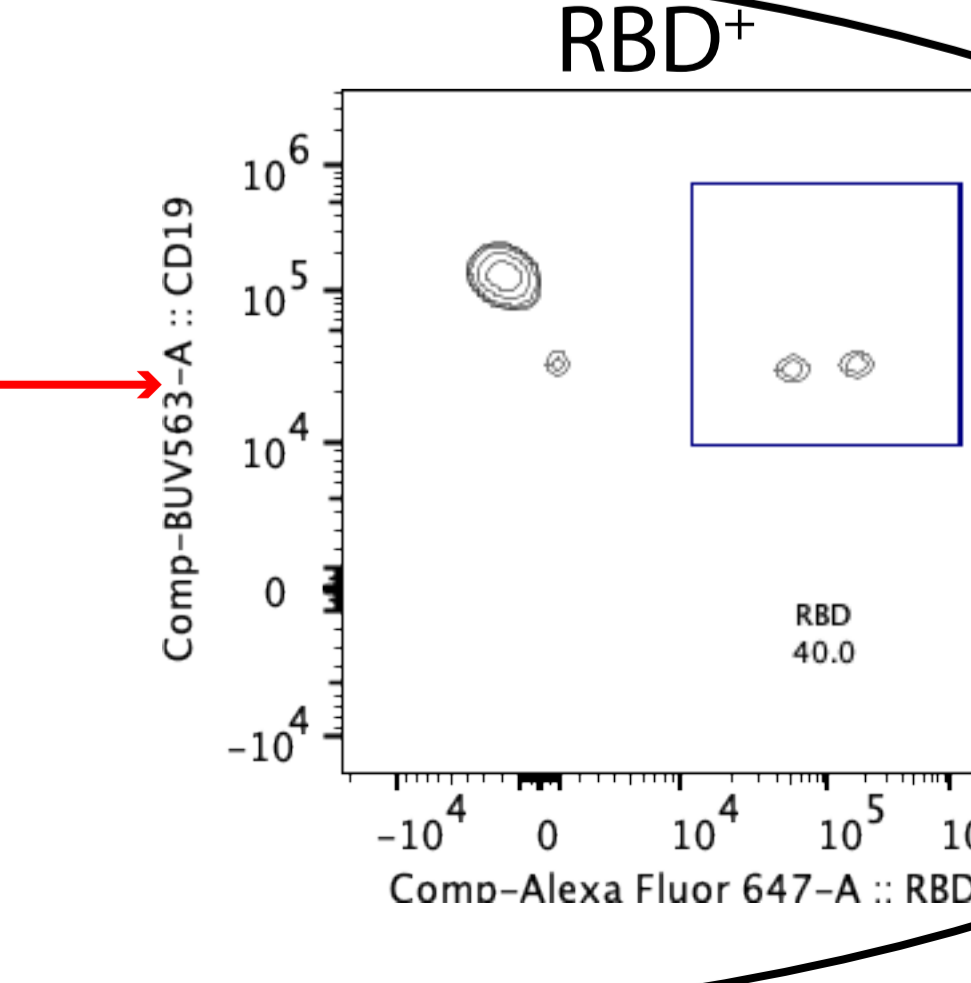

DN2 B cells

Supplement: NIHMS1990255-supplement-MMC2.pdf [file NIHMS1990255-supplement-MMC2.pdf]

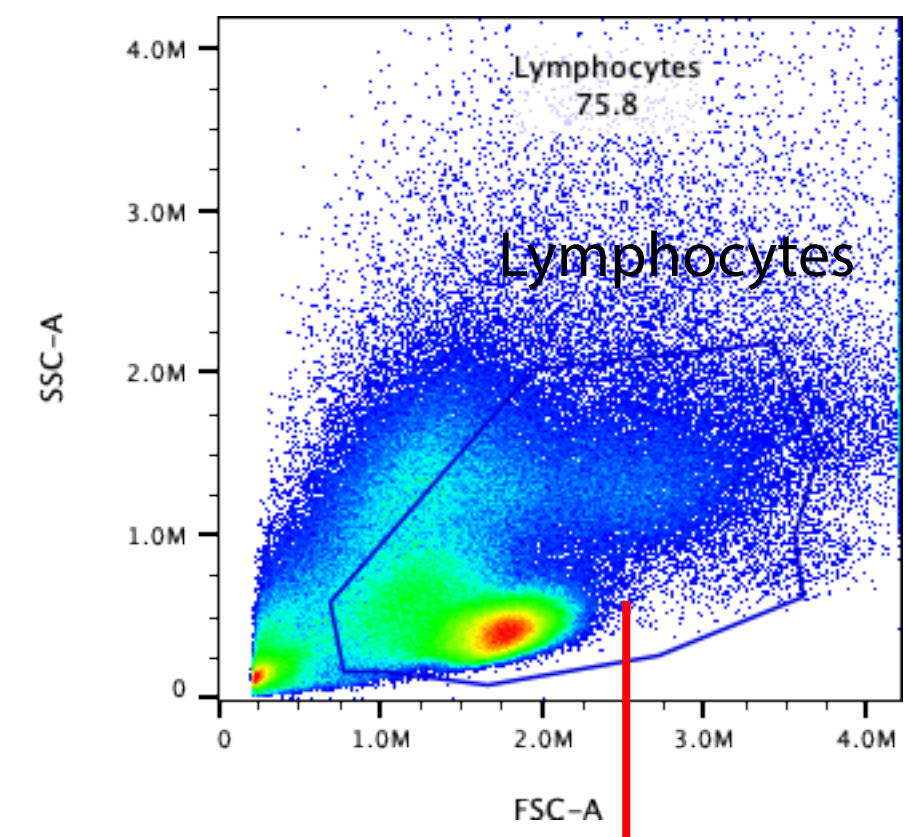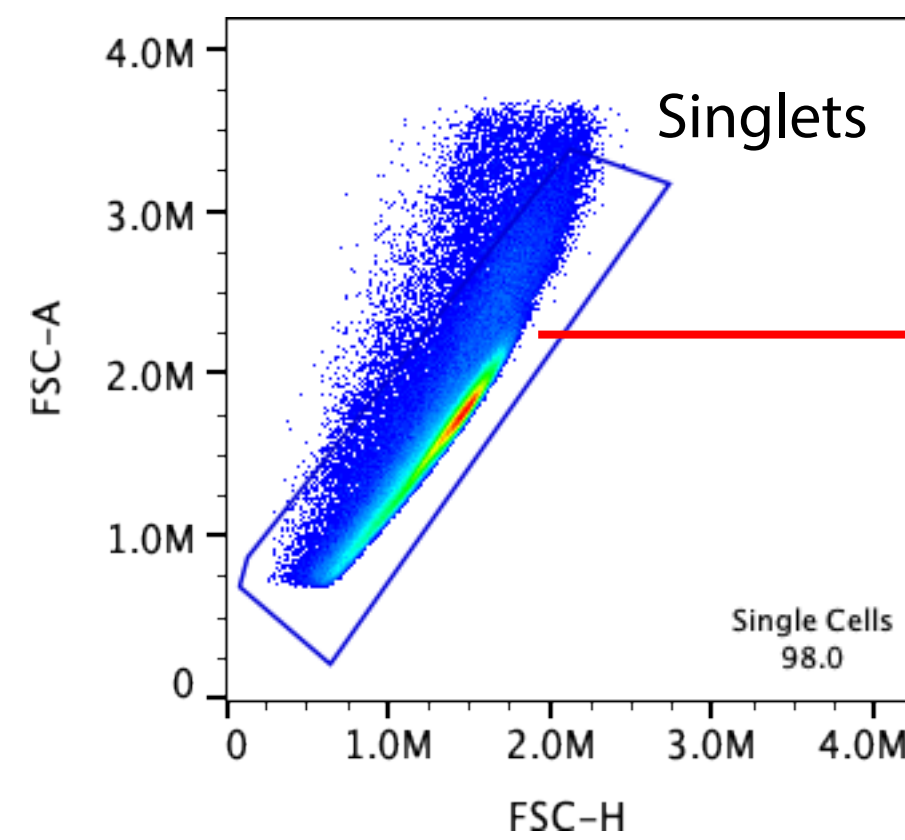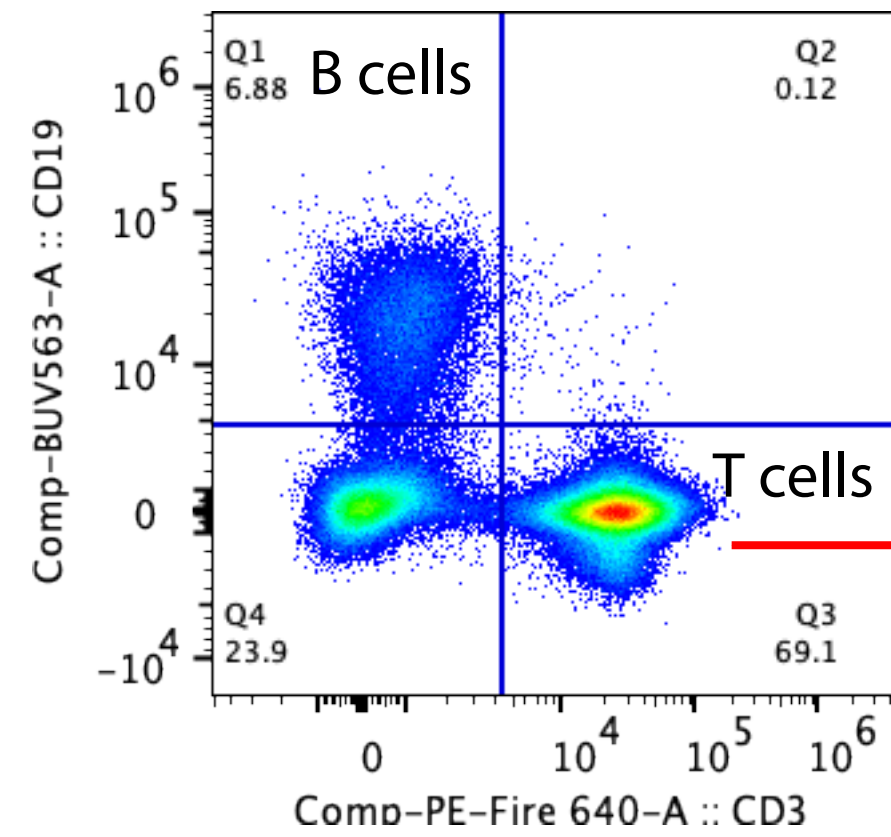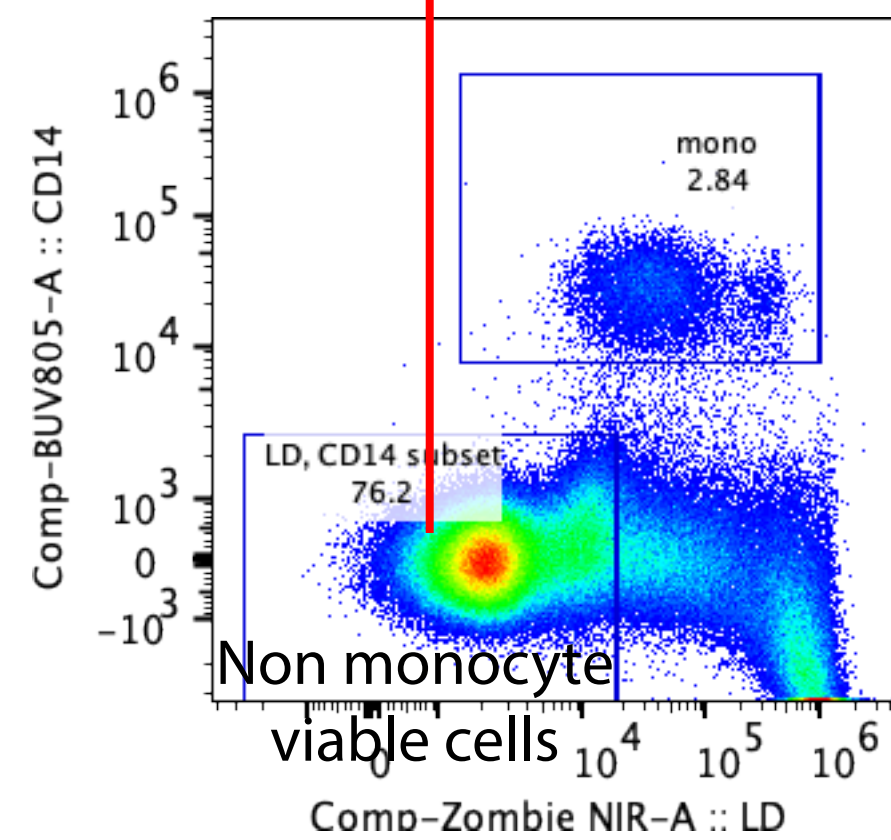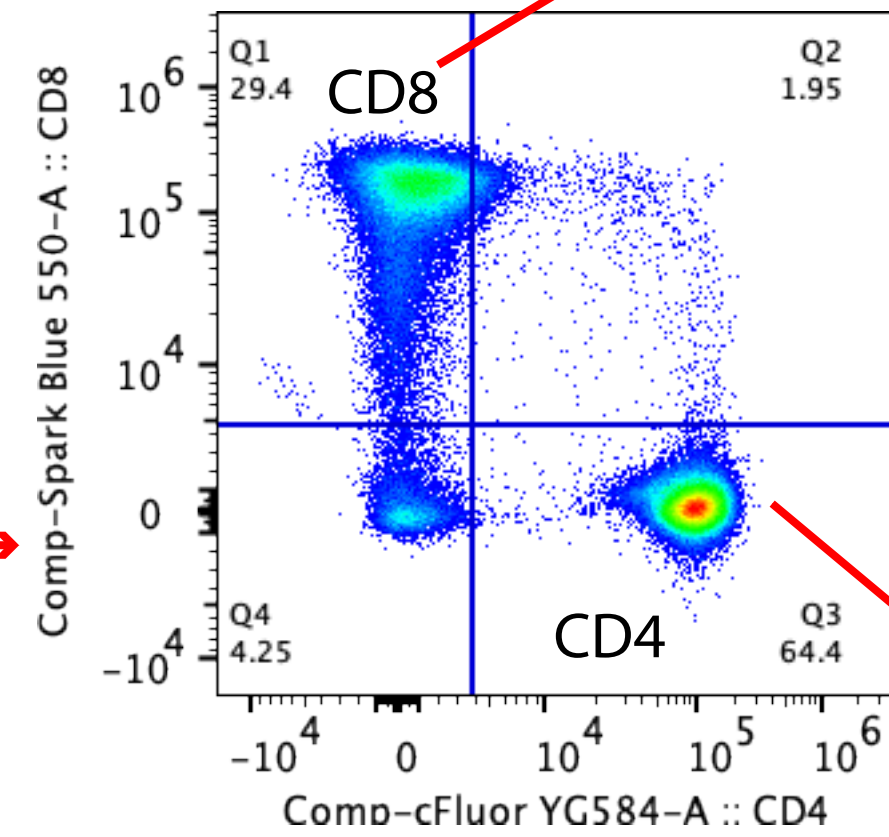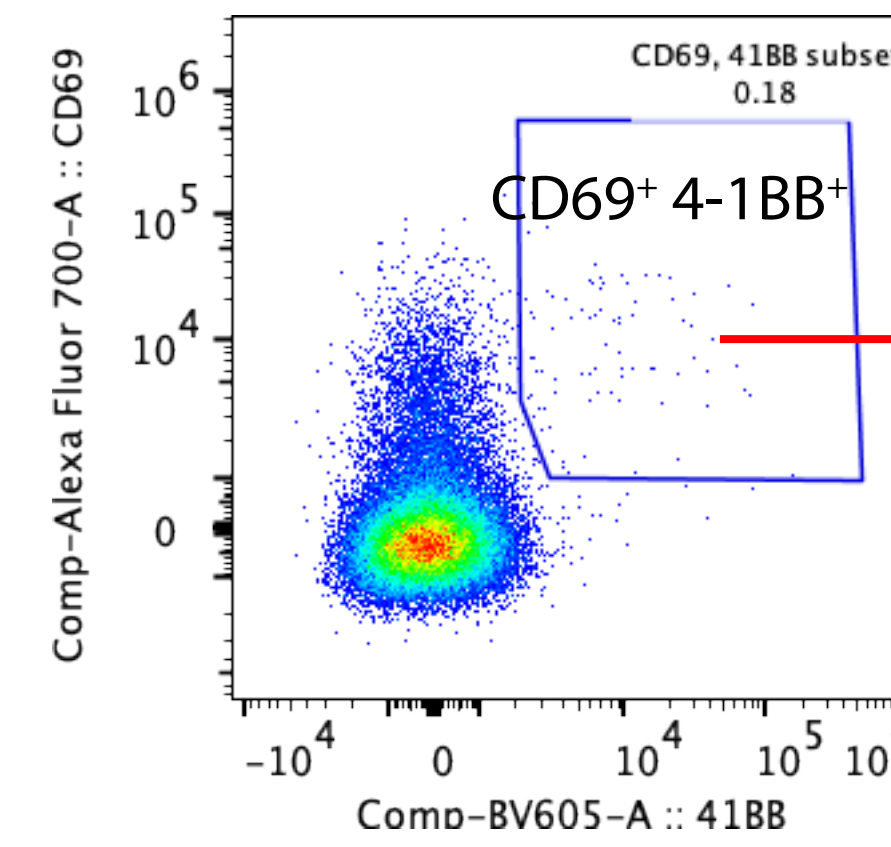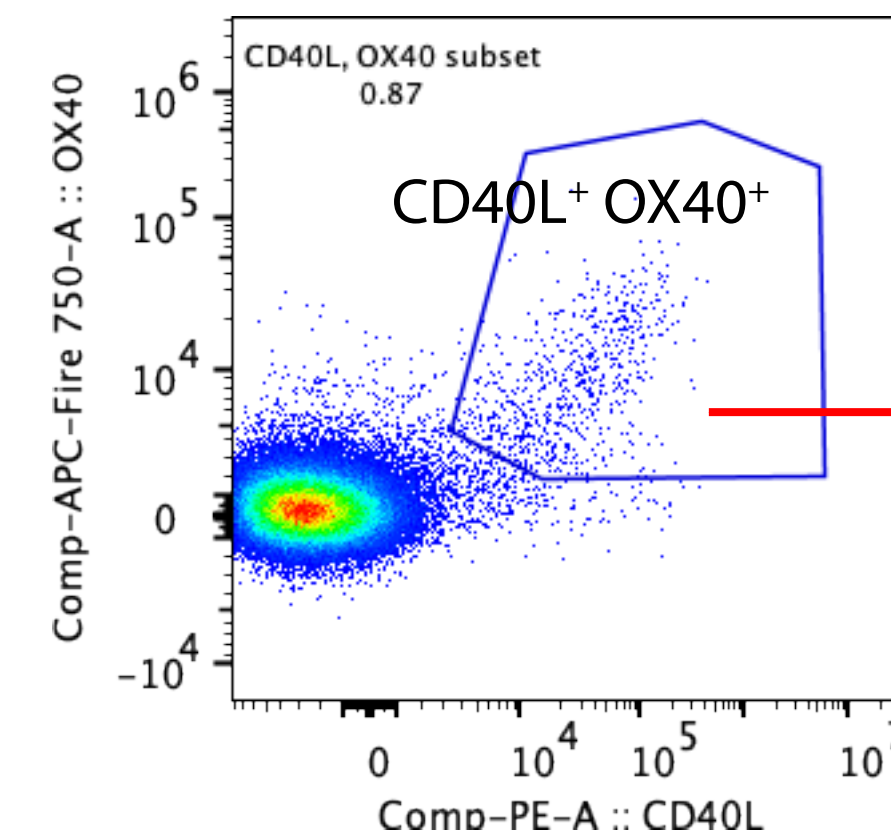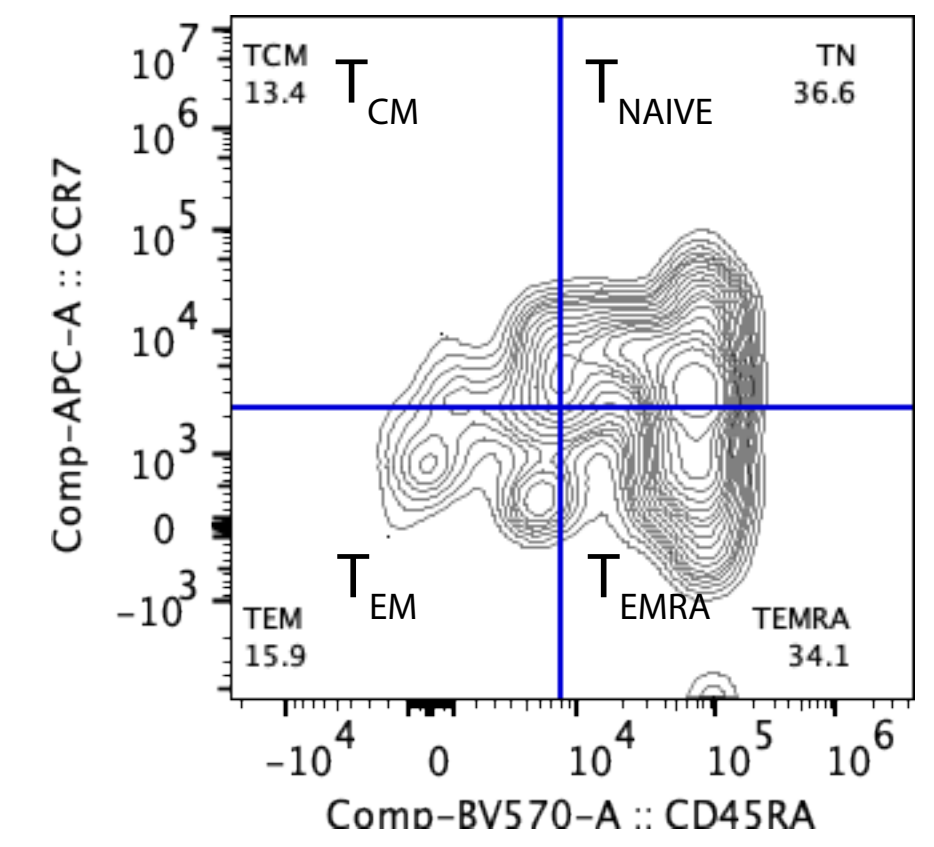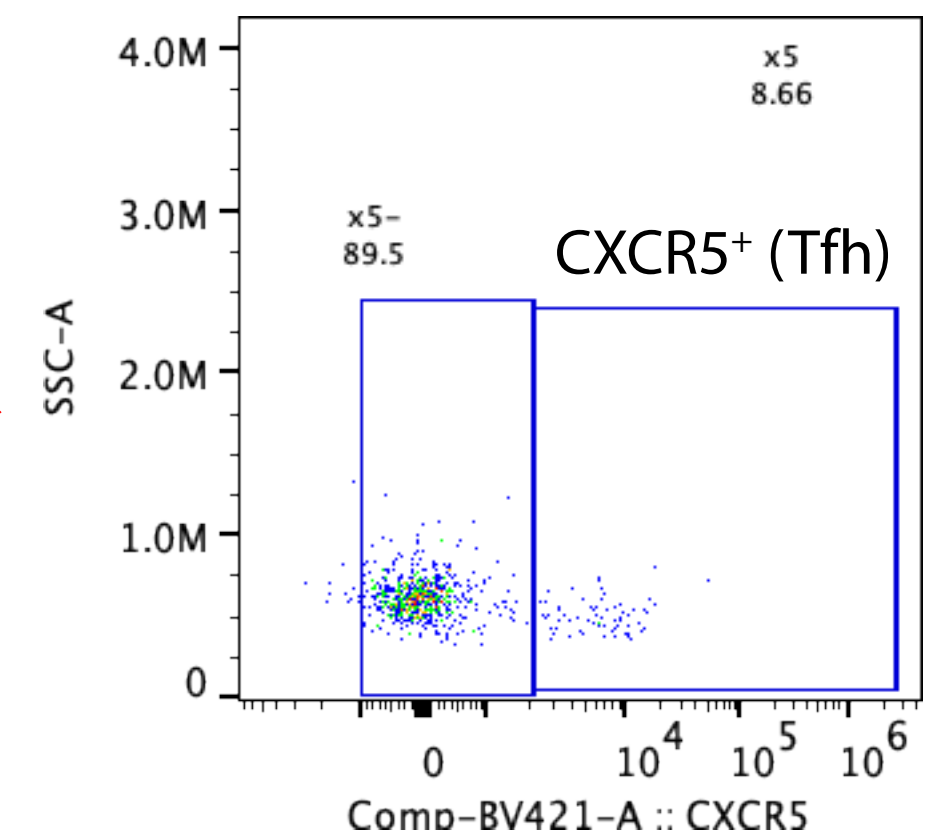

Supplement: NIHMS1990255-supplement-MMC3.pdf [file NIHMS1990255-supplement-MMC3.pdf]

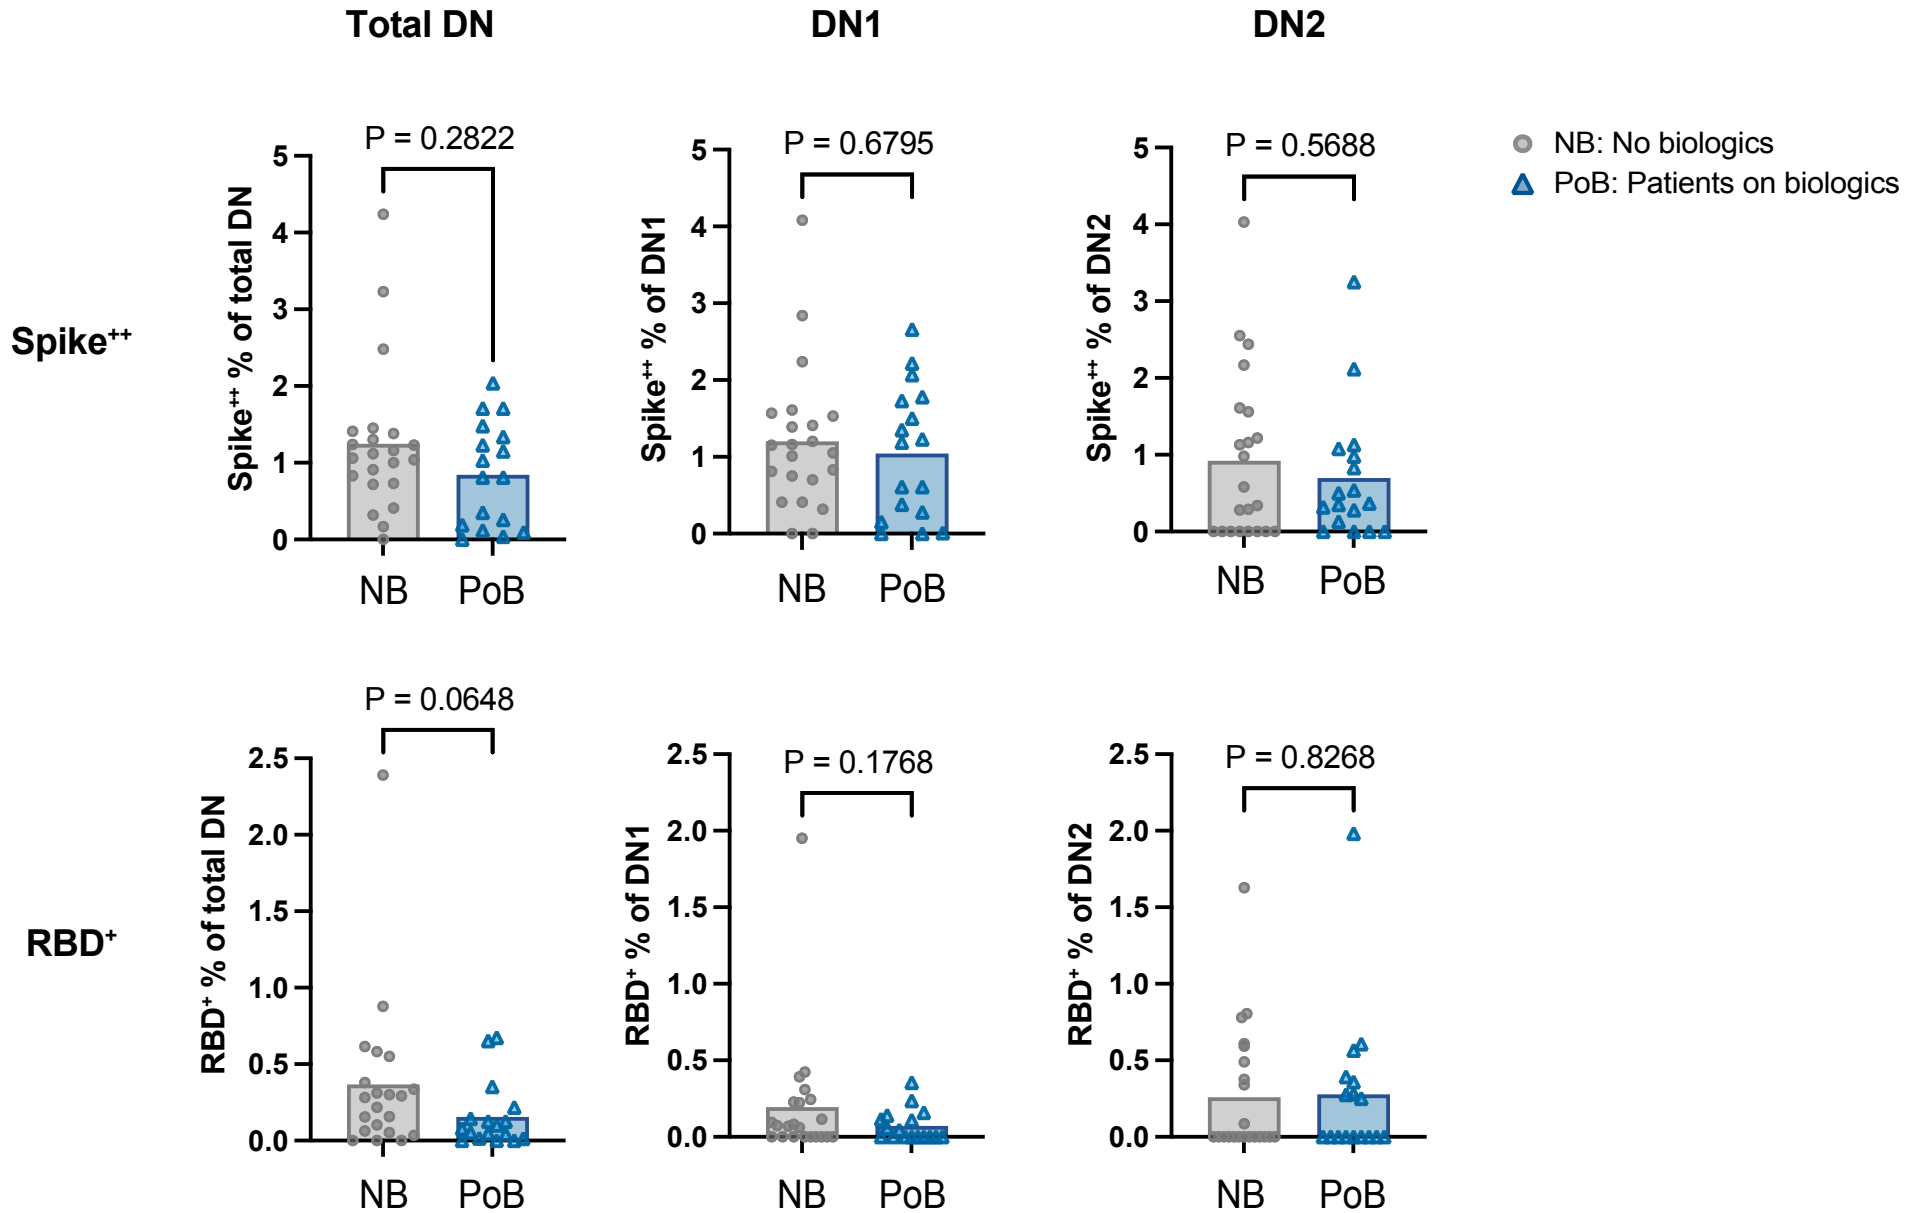

Supplement: NIHMS1990255-supplement-MMC4.pdf [file NIHMS1990255-supplement-MMC4.pdf]

## All biologics

## Dupilumab only

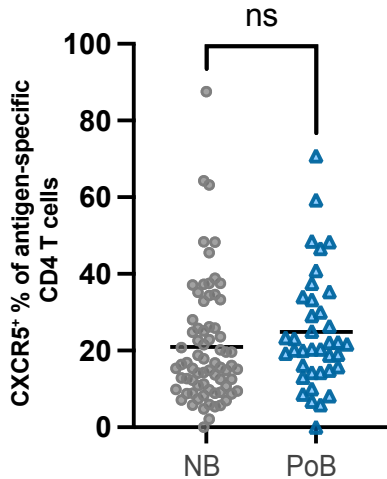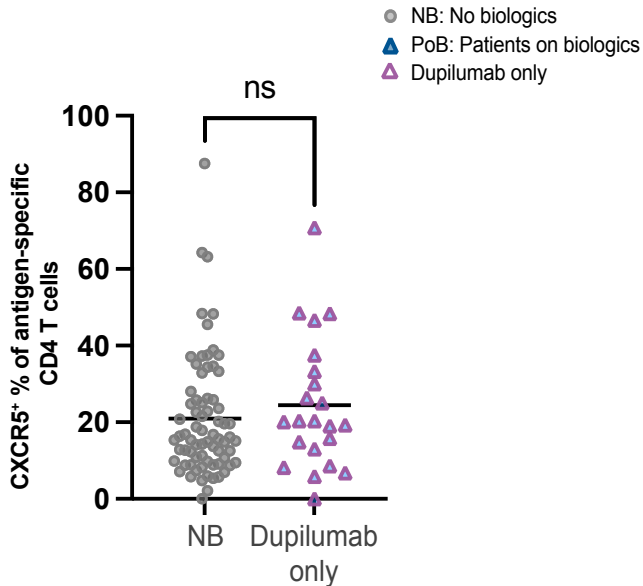

Supplement: NIHMS1990255-supplement-MMC5.pdf [file NIHMS1990255-supplement-MMC5.pdf]

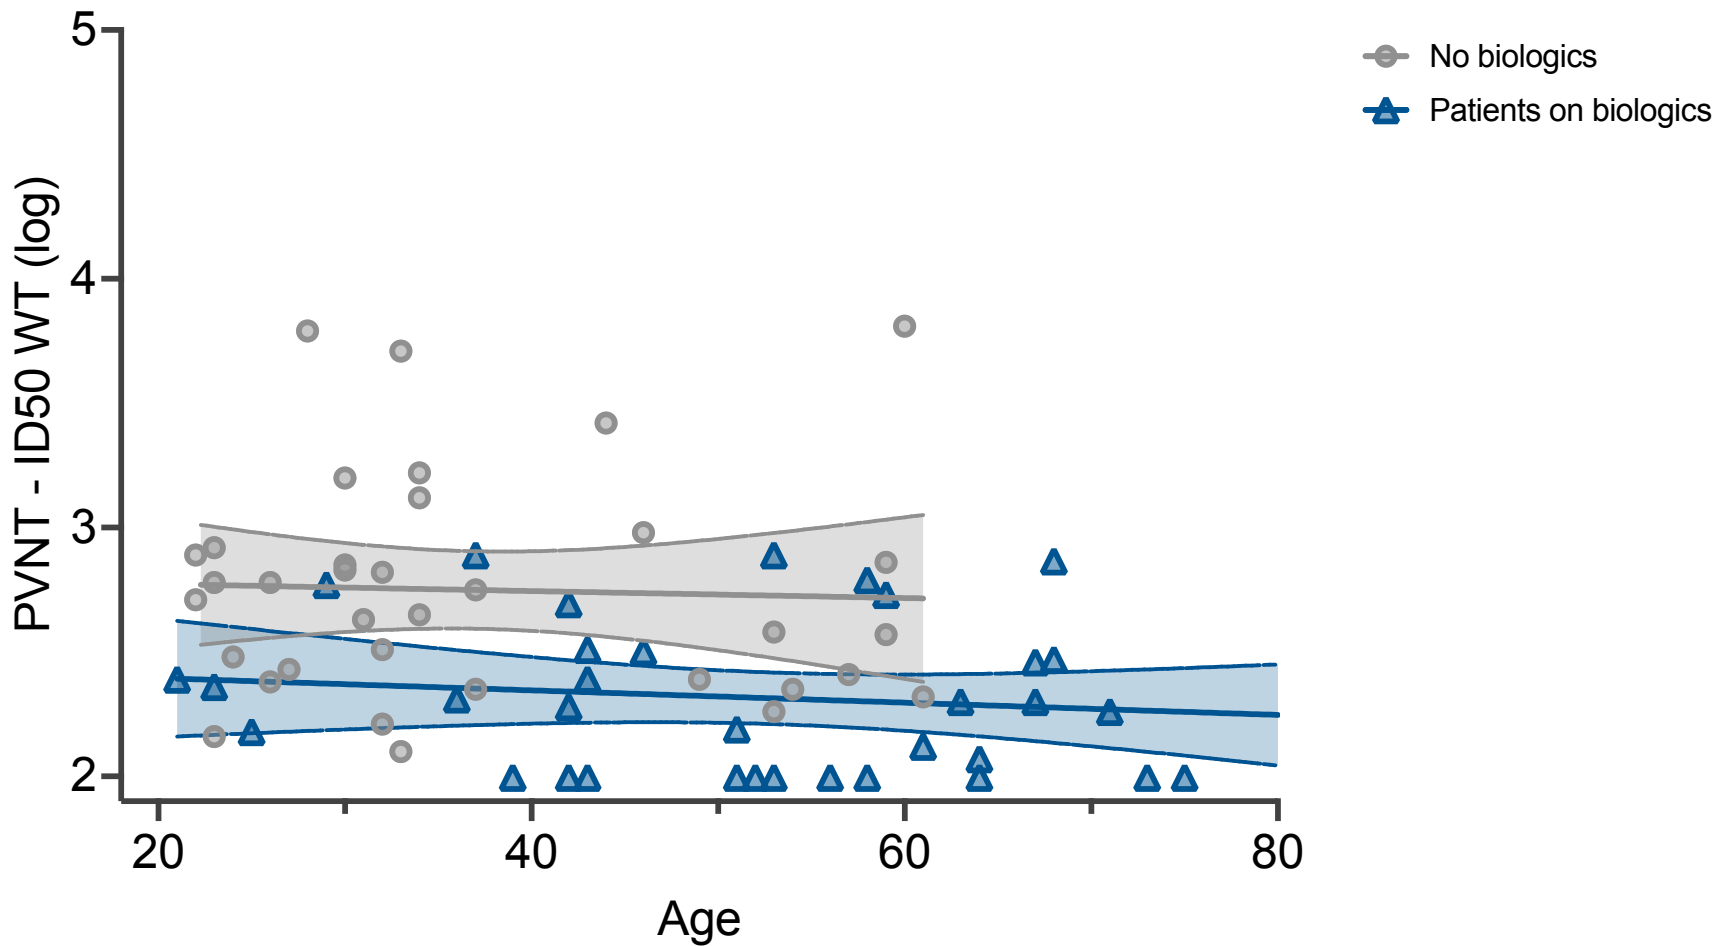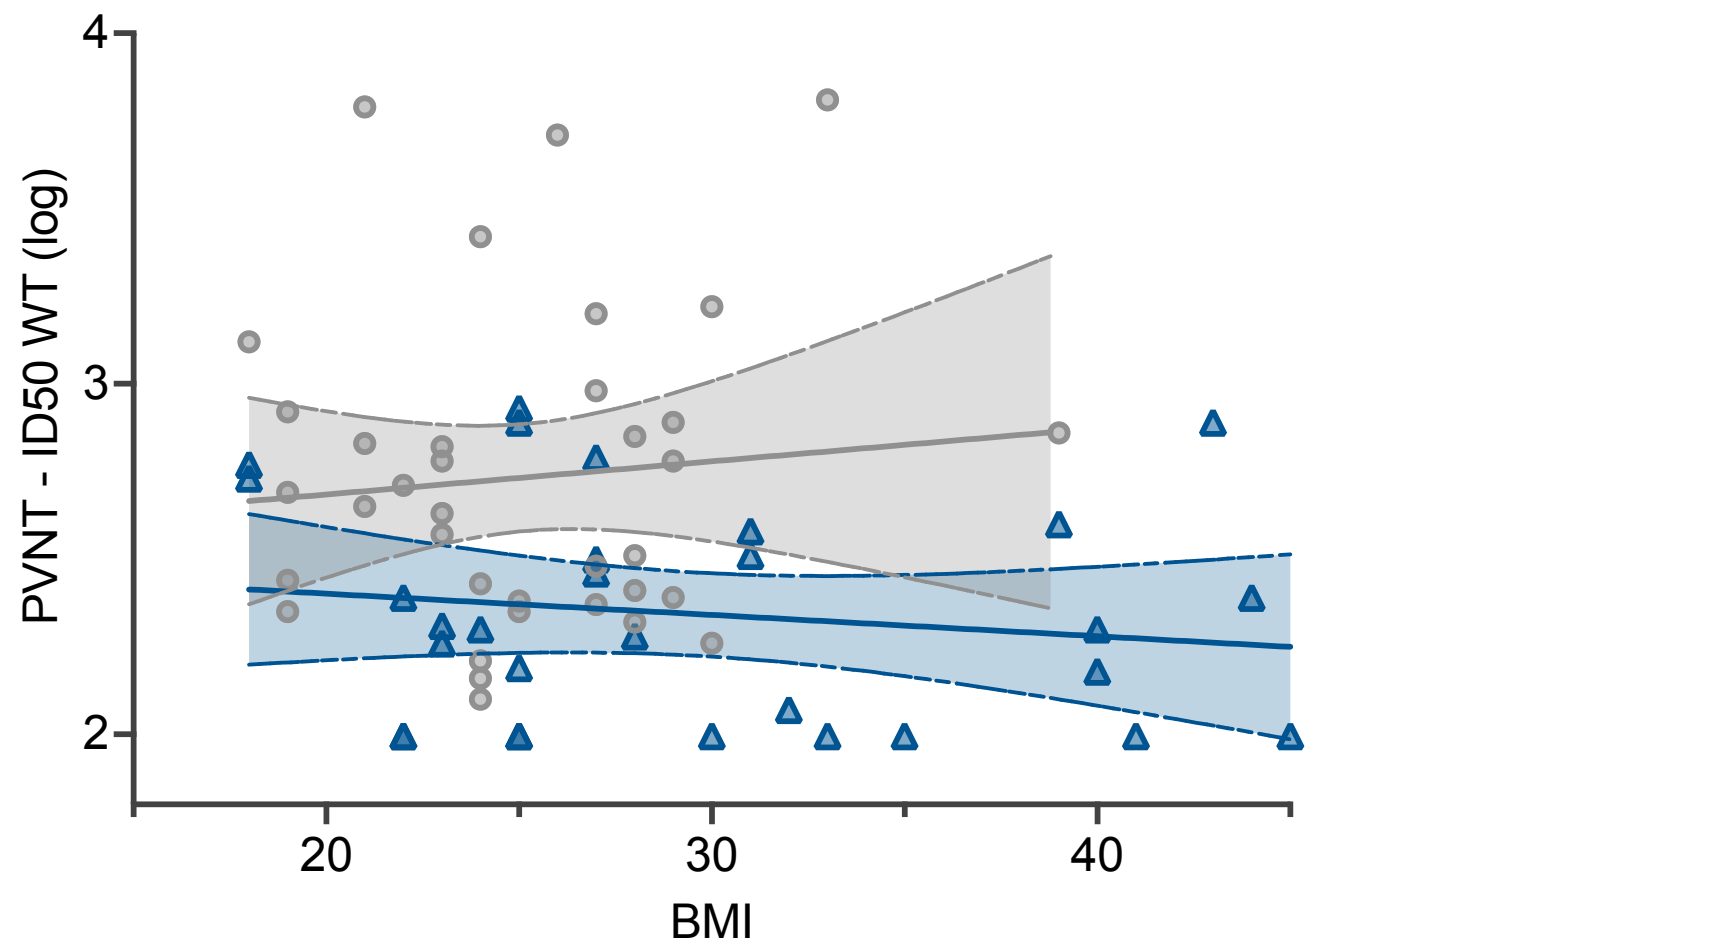

Supplement: NIHMS1990255-supplement-MMC6.pdf [file NIHMS1990255-supplement-MMC6.pdf]

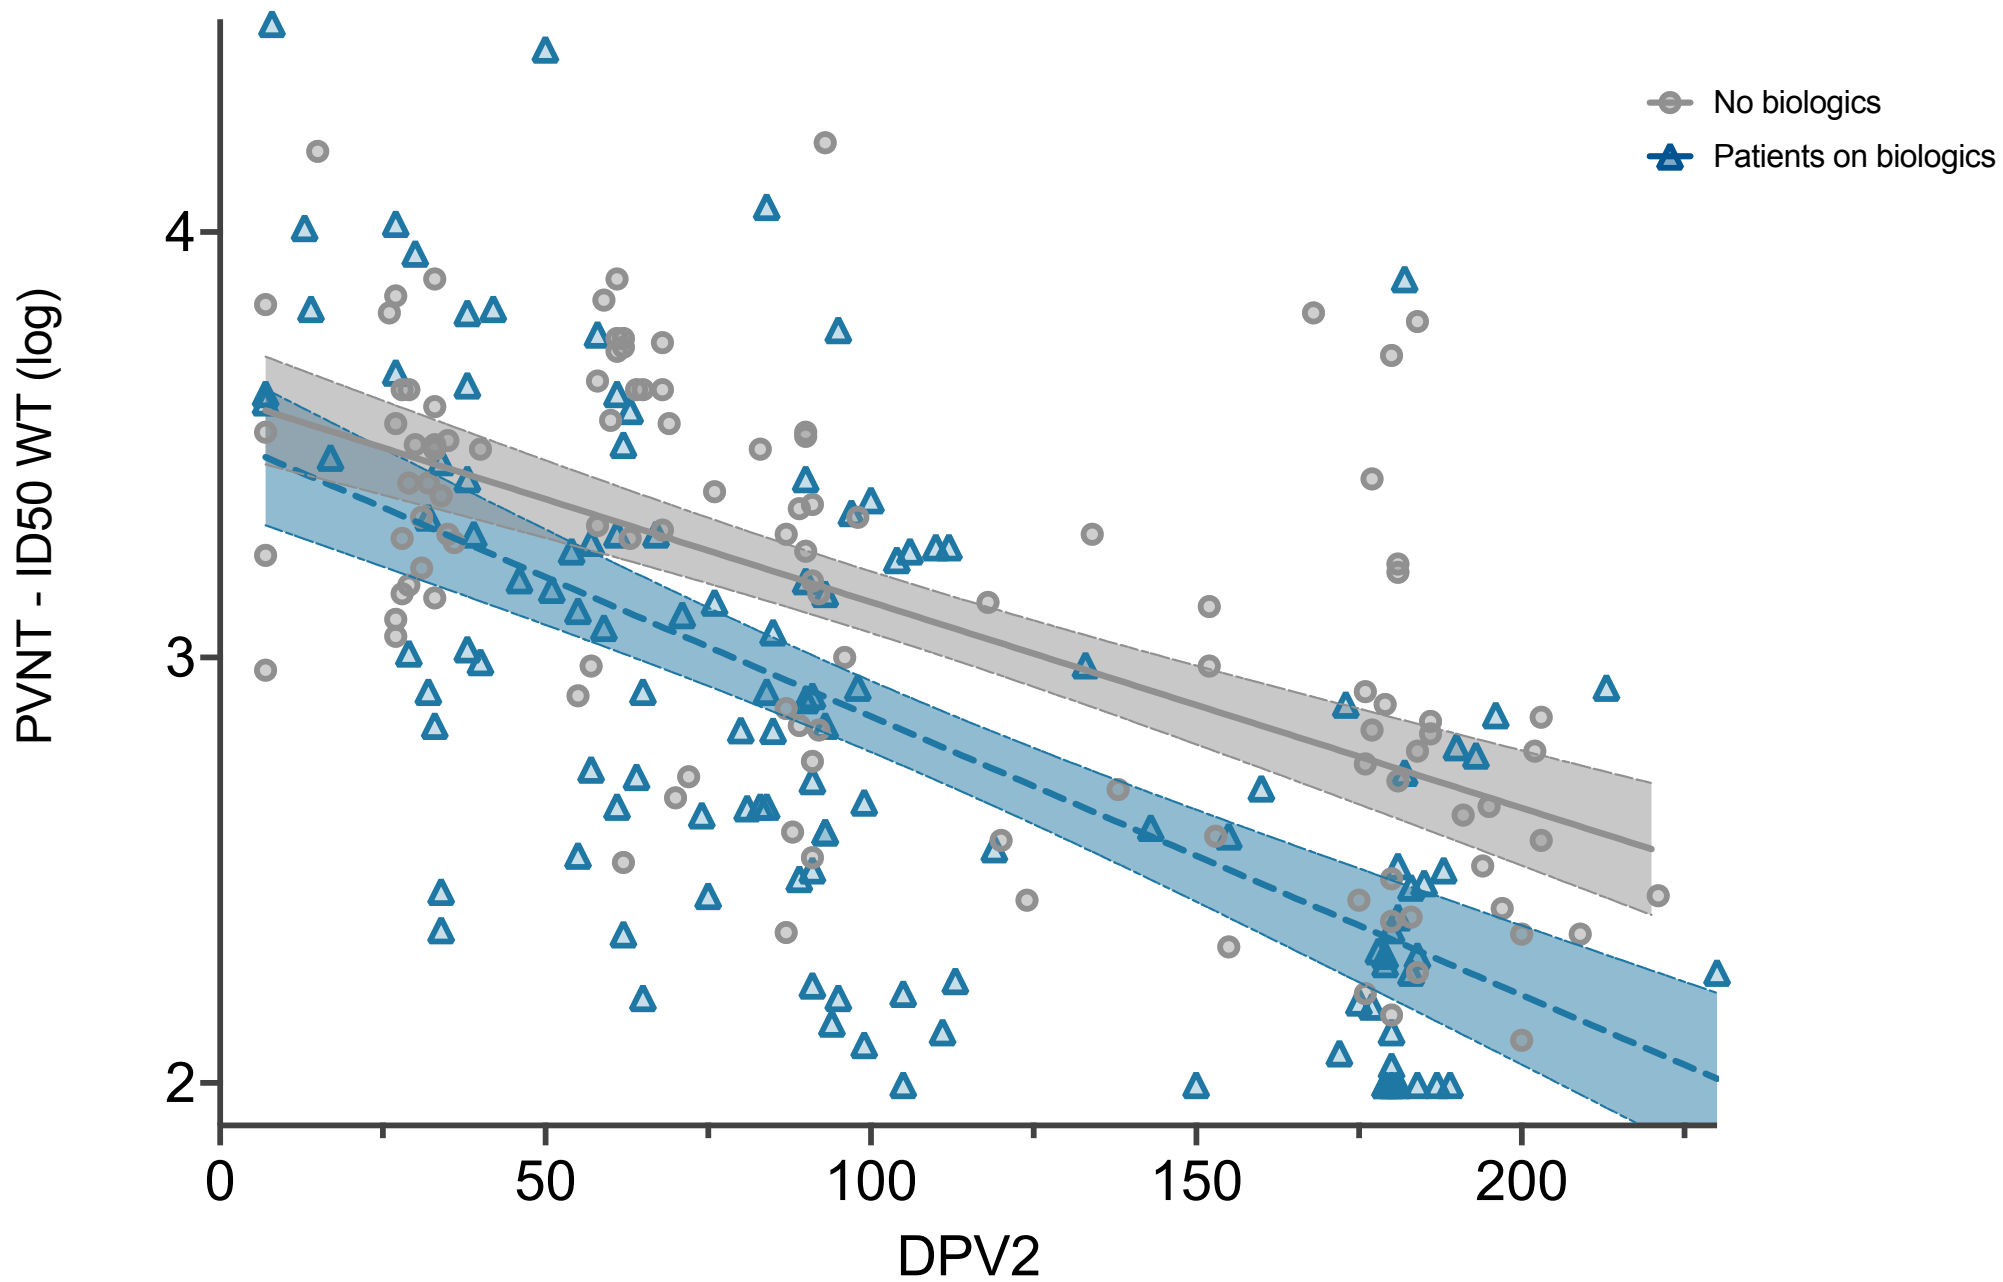

Supplement: NIHMS1990255-supplement-MMC7.pdf [file NIHMS1990255-supplement-MMC7.pdf]

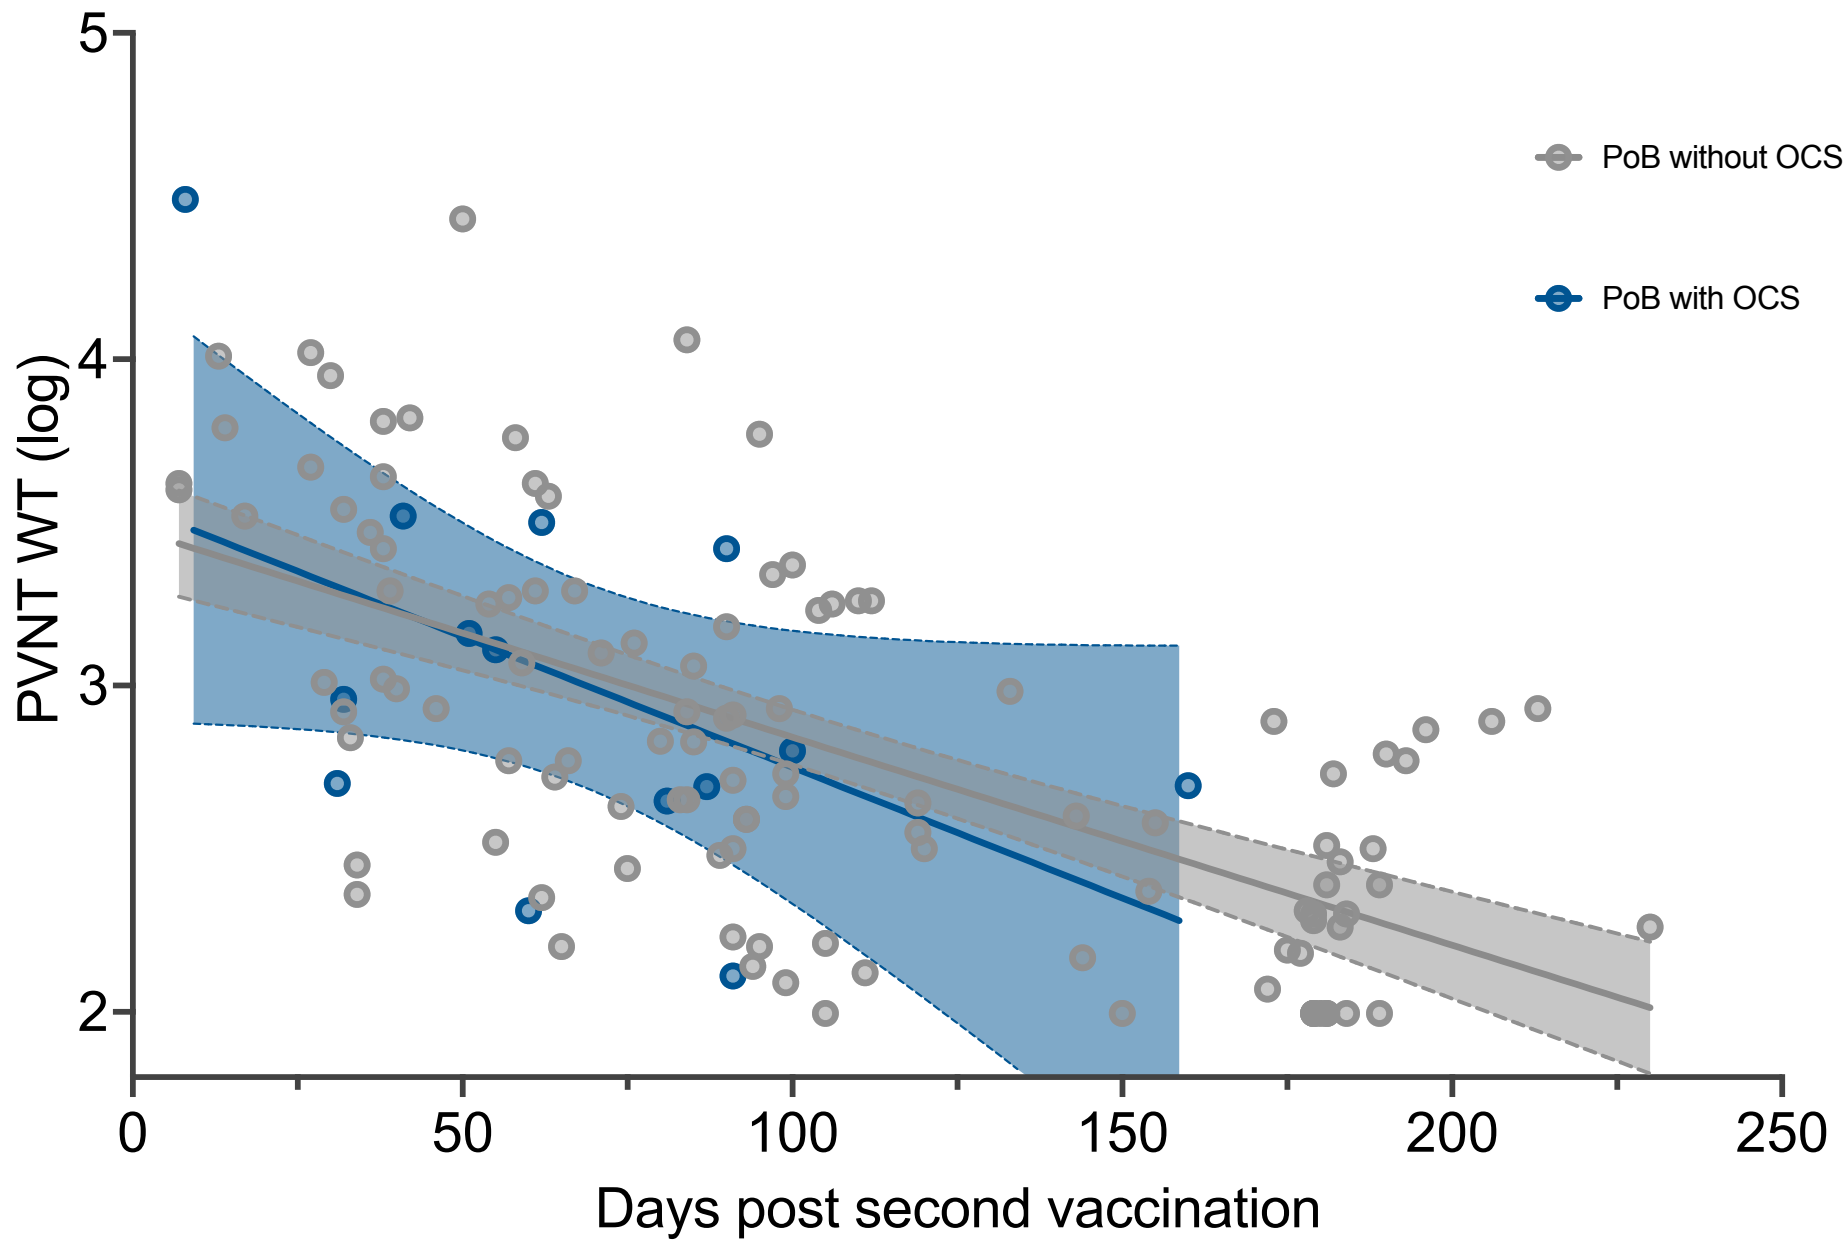

Supplement: NIHMS1990255-supplement-MMC8.pdf [file NIHMS1990255-supplement-MMC8.pdf]

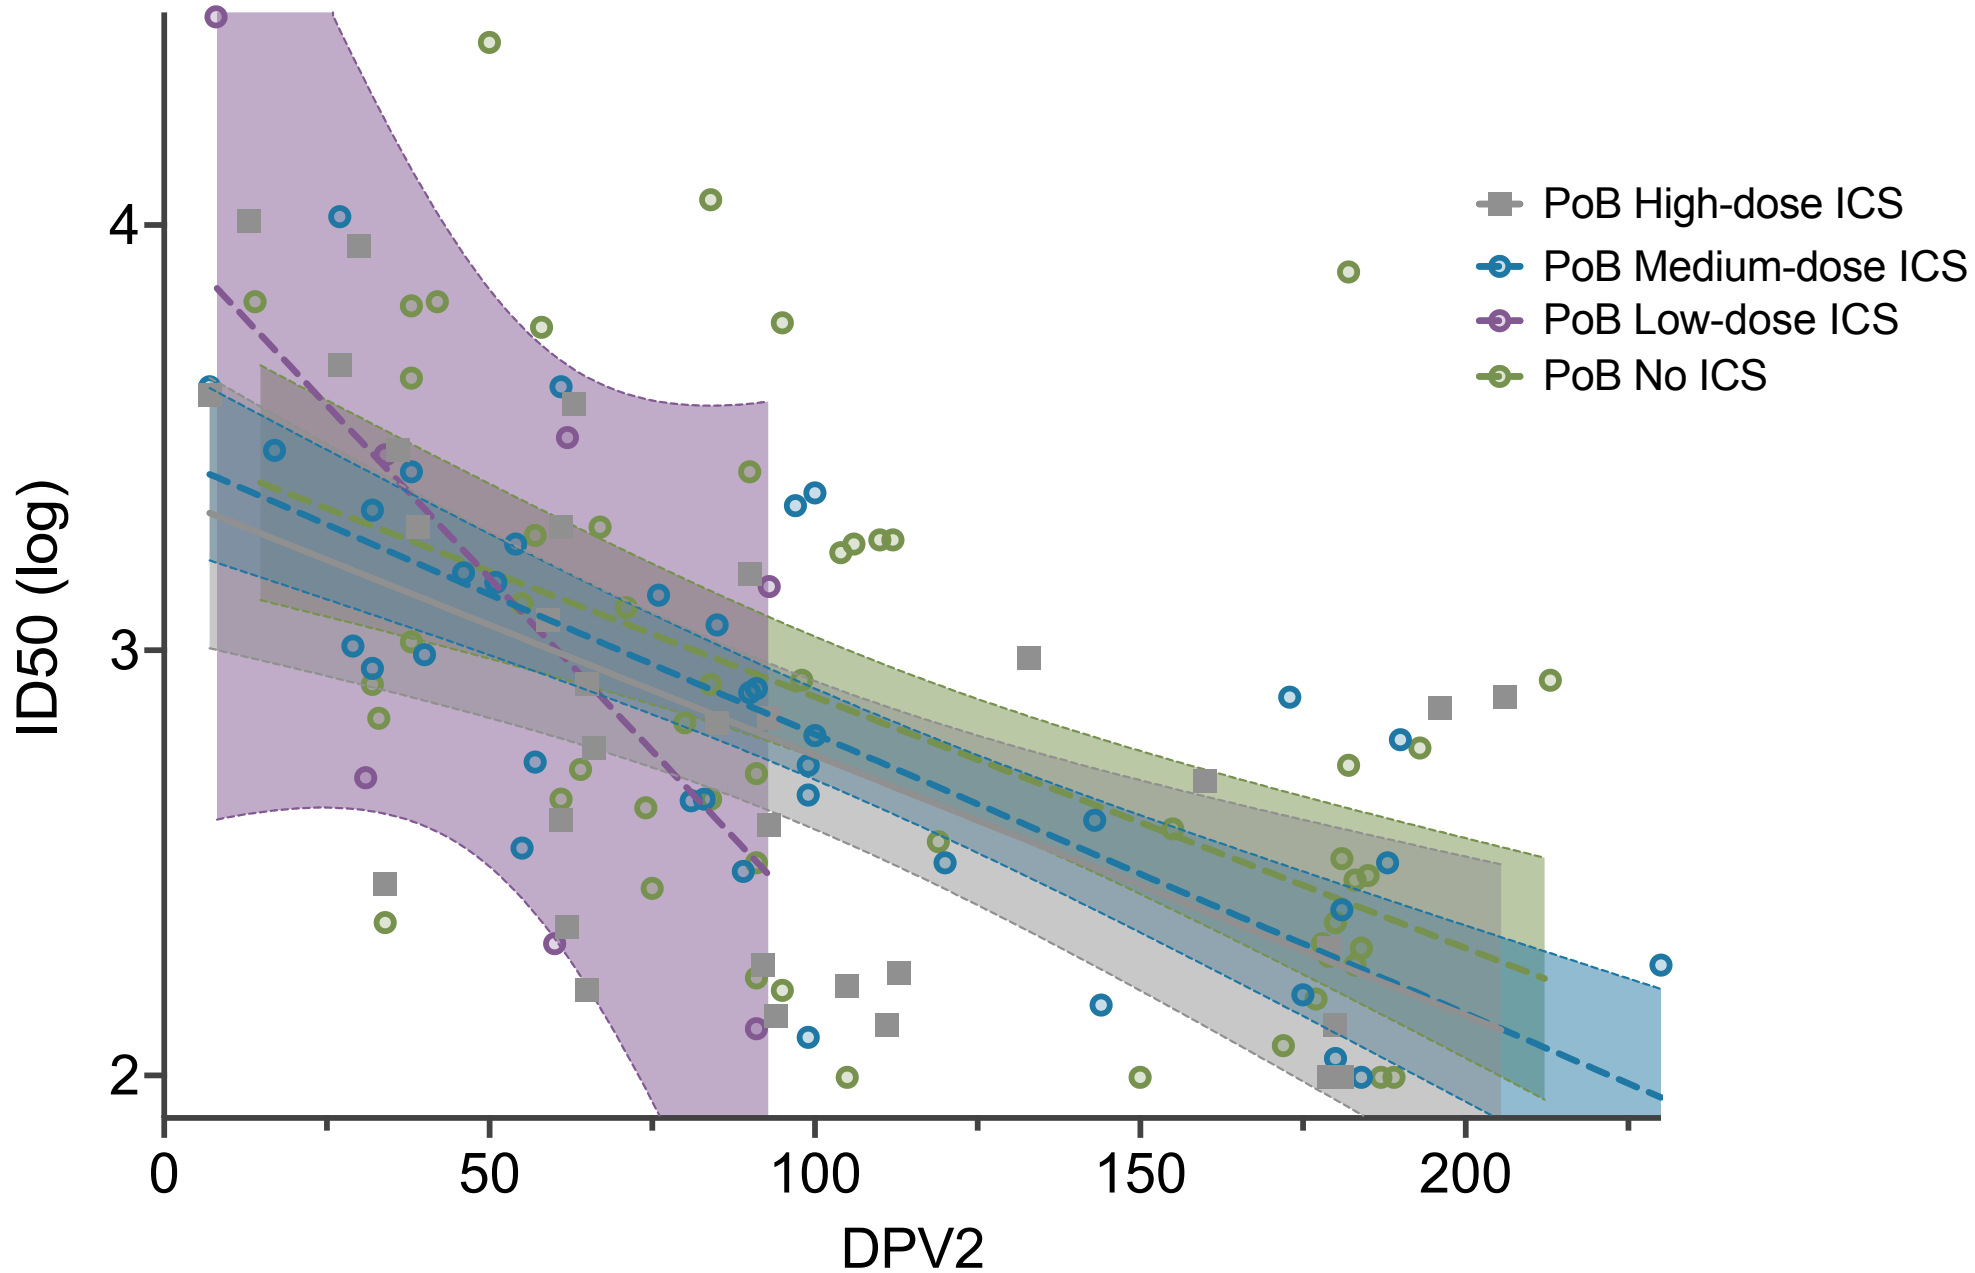

Supplement: NIHMS1990255-supplement-MMC9.pdf [file NIHMS1990255-supplement-MMC9.pdf]
